# Supplementary material for: A new route to tricyclane sesquiterpenoids: total synthesis of α-ekasantalic acid
Source: Royal Society of Chemistry journal article supplement (doi:10.1039/c9ob00630c), 2019-01-01

Test L1E-2

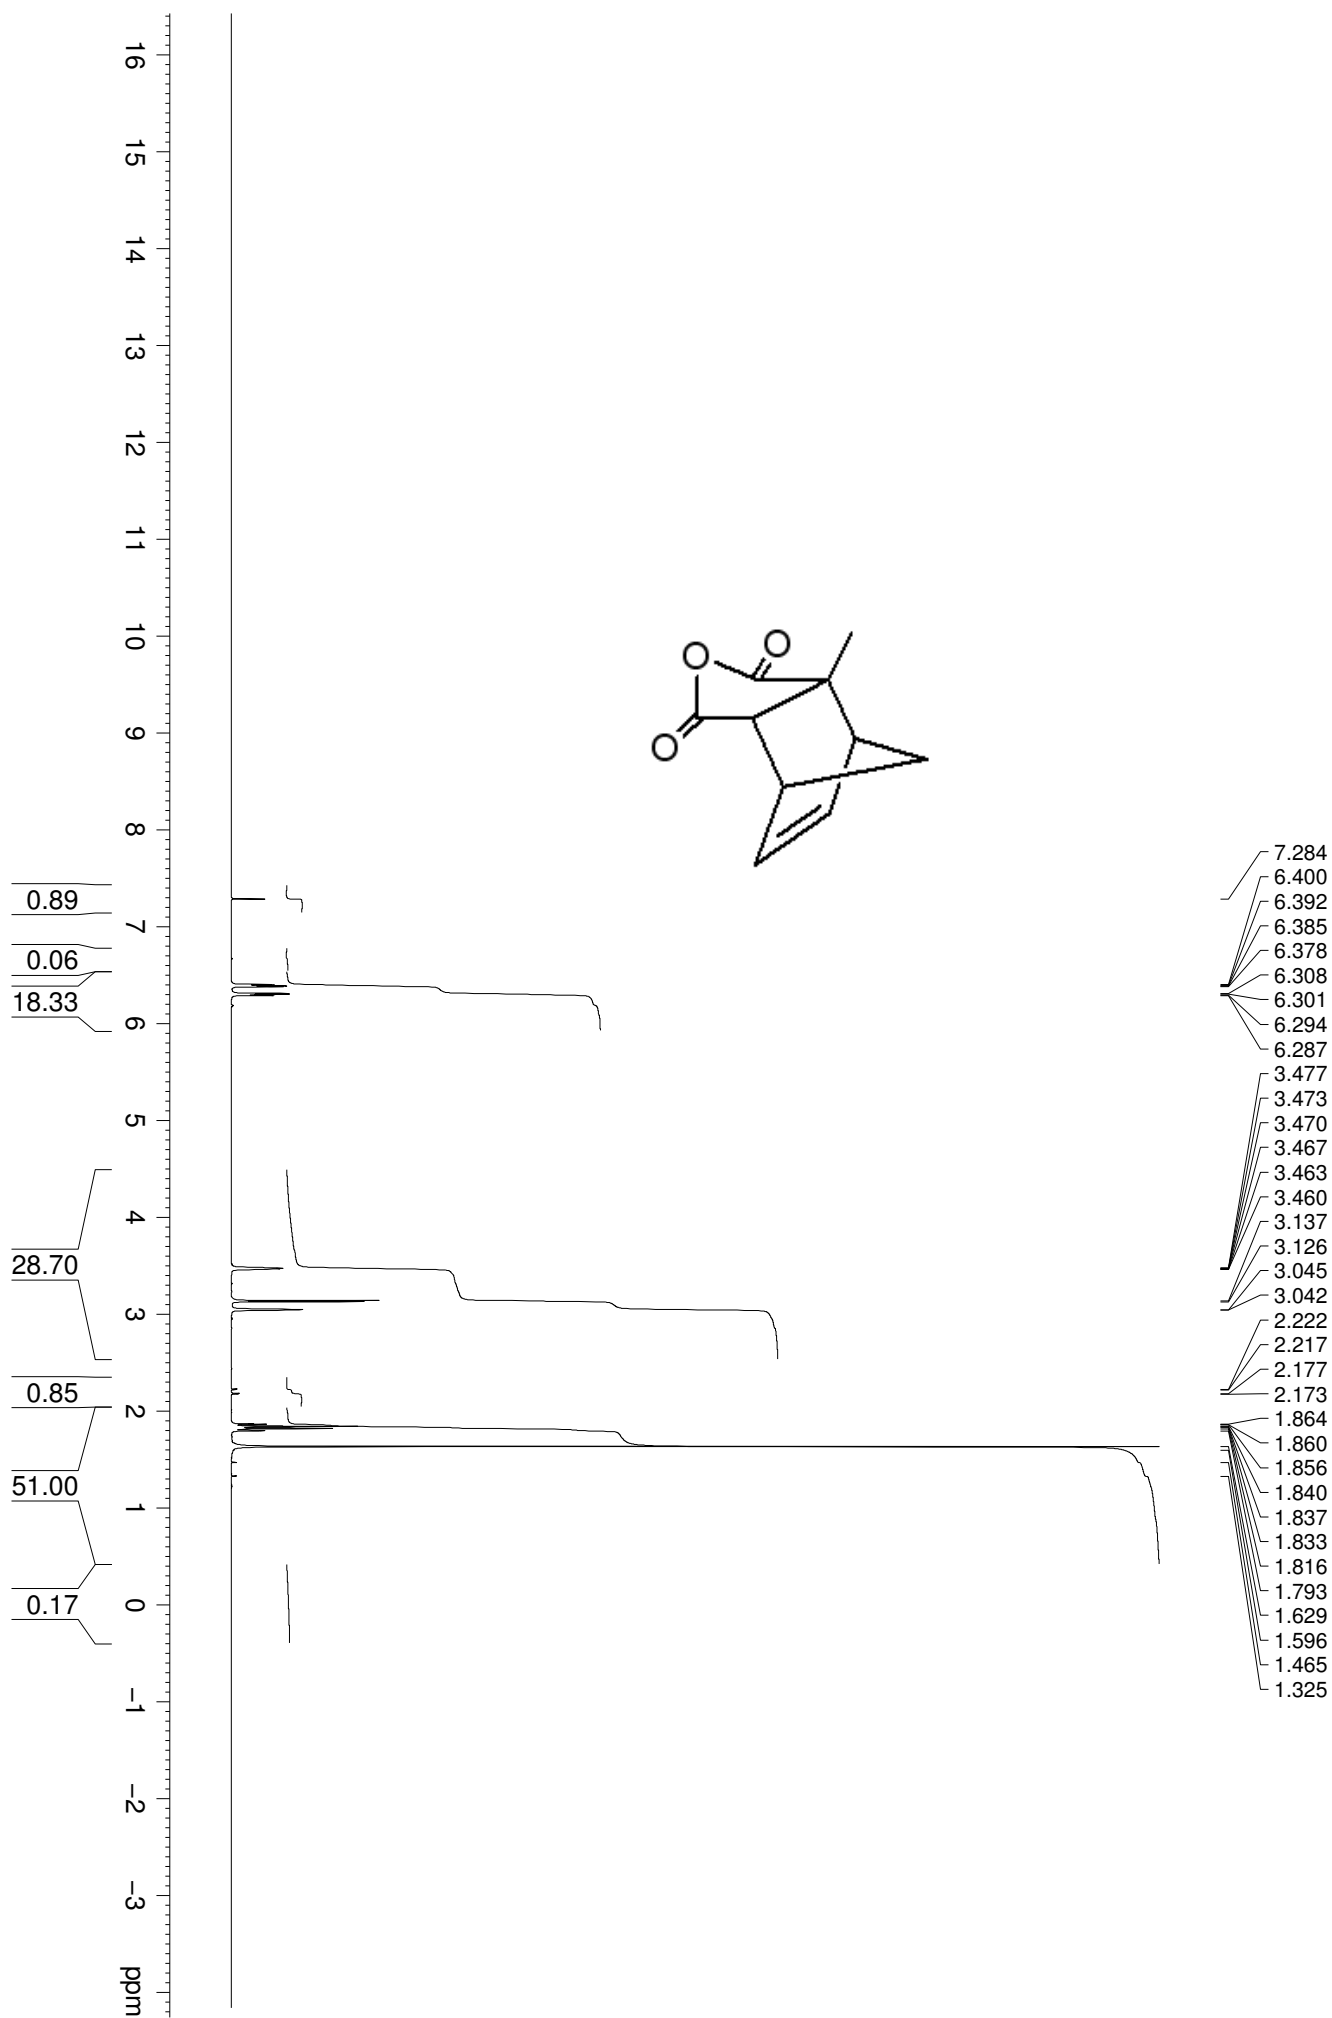

LLE-3. Solid sample

177.68  
173.77

136.86  
133.71

65.15  
58.00  
55.70  
52.38  
45.71  
45.28  
40.06  
39.85  
39.64  
39.44  
39.23  
39.02  
38.81  
28.46  
22.15  
21.79

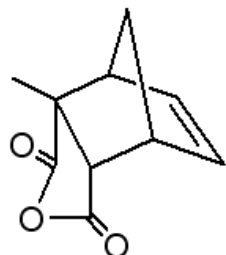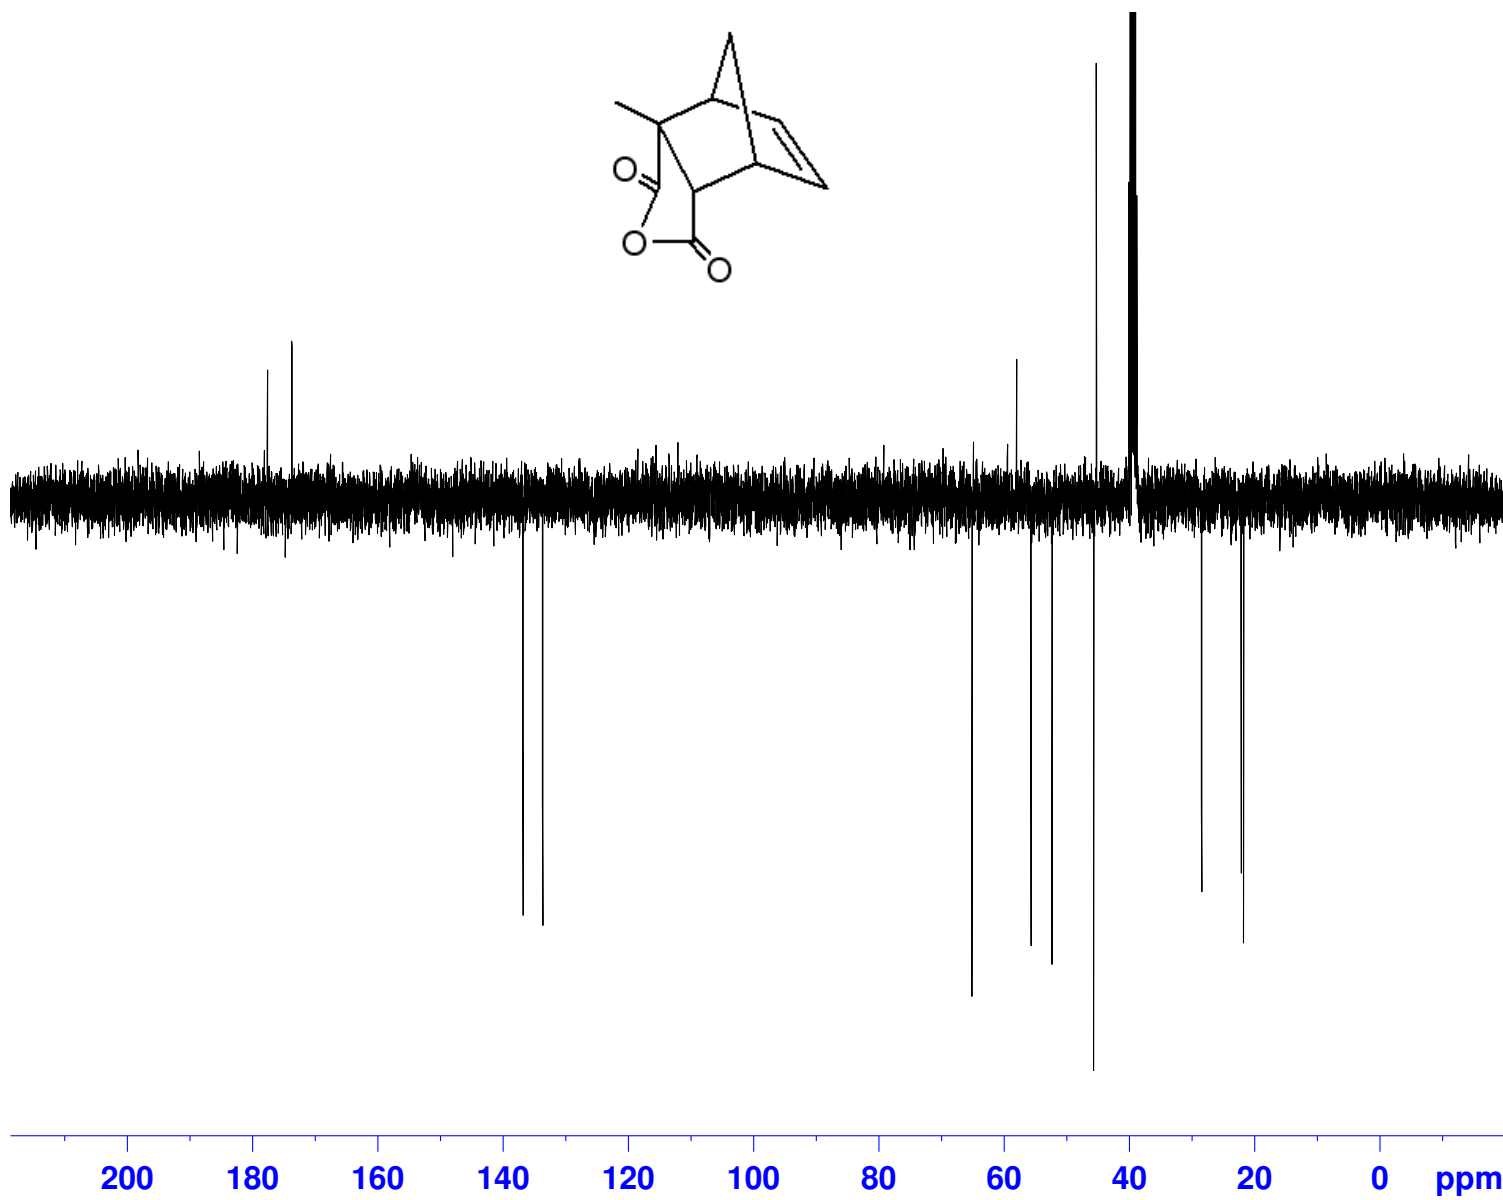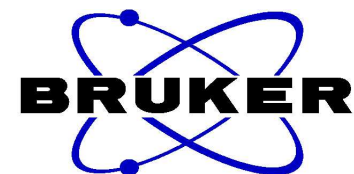

Current Data Parameters  
NAME LLE110707  
EXPNO 31  
PROCNO 1

F2 - Acquisition Parameters  
Date\_ 20110707  
Time 15.39  
INSTRUM DPX400  
PROBHD 5 mm QNP 1H/13  
PULPROG deptq\_135  
TD 65536  
SOLVENT DMSO  
NS 512  
DS 4  
SWH 23980.814 Hz  
FIDRES 0.365918 Hz  
AQ 1.3664756 sec  
RG 11585.2  
DW 20.850 usec  
DE 6.00 usec  
TE 295.2 K  
CNST2 145.0000000  
D1 2.0000000 sec  
d2 0.00344828 sec  
D11 0.03000000 sec  
DELTA 0.00001019 sec

==== CHANNEL f1 =====  
NUC1 13C  
P1 8.00 usec  
P2 16.00 usec  
PL1 -2.60 dB  
SFO1 100.6228300 MHz

==== CHANNEL f2 =====  
CPDPRG2 waltz16  
NUC2 1H  
P3 10.00 usec  
P4 20.00 usec  
PCPD2 80.00 usec  
PL2 -1.50 dB  
PL12 17.50 dB  
SFO2 400.1316000 MHz

F2 - Processing parameters  
SI 32768  
SF 100.6128193 MHz  
WDW EM  
SSB 0  
LB 1.00 Hz  
GB 0  
PC 1.40

LIE/5. Proton

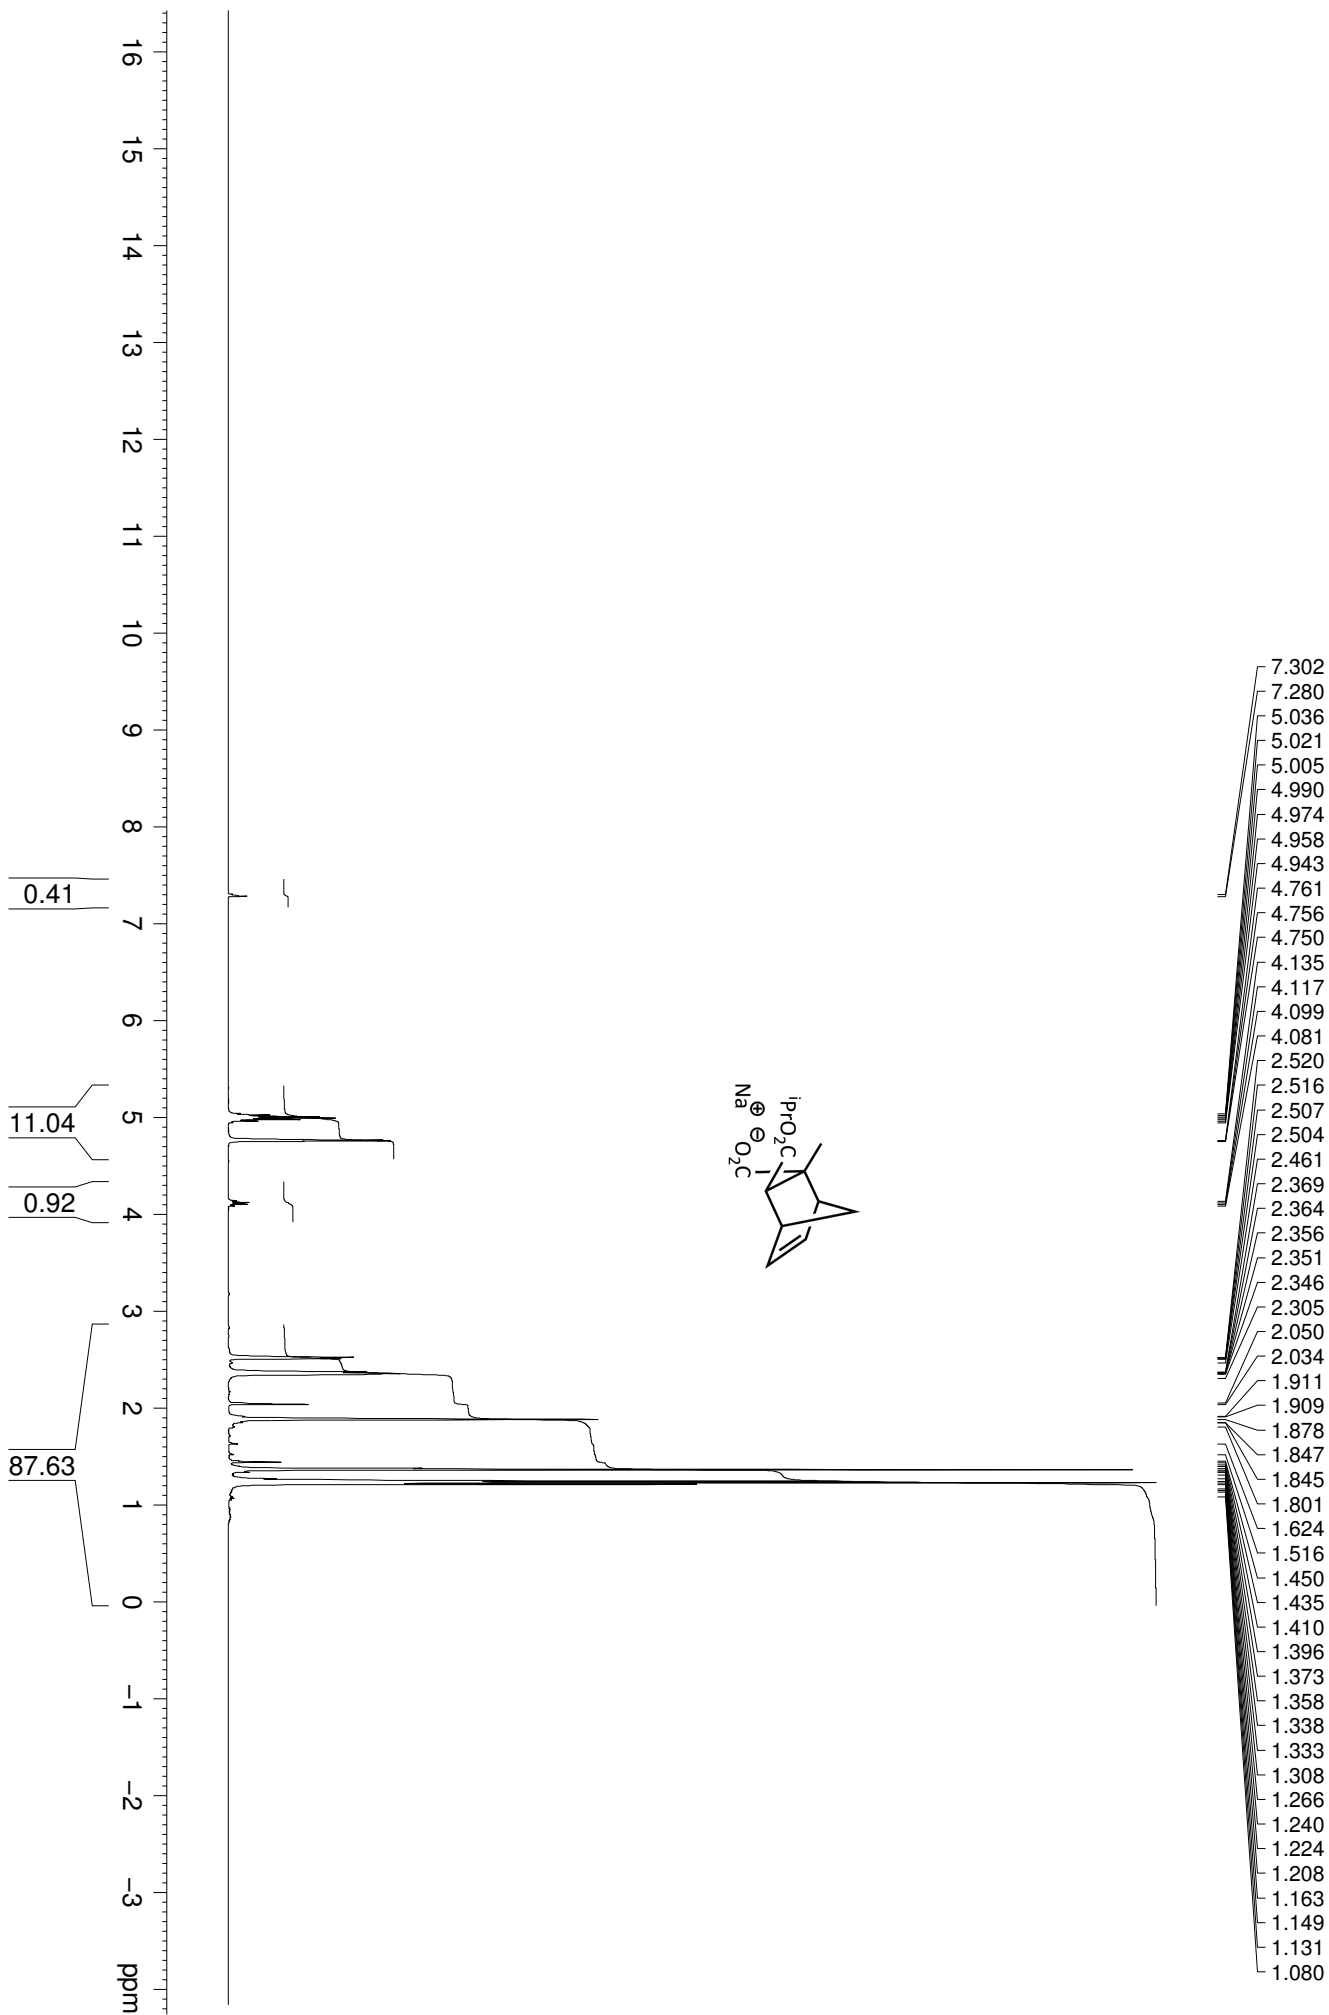

LLE/5.Carbon

177.70  
169.41

81.90  
77.41  
77.09  
76.77  
68.62

52.24  
51.20

35.31  
32.89  
31.75  
28.95  
21.79  
21.68

10.53

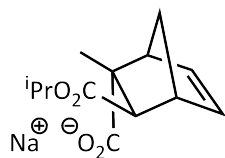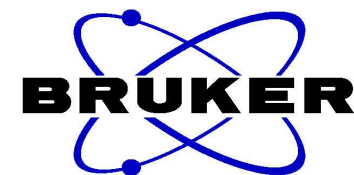

Current Data Parameters  
 NAME LLE110712  
 EXPNO 11  
 PROCNO 1

F2 - Acquisition Parameters  
 Date\_ 20110712  
 Time 10.57  
 INSTRUM DPX400  
 PROBHD 5 mm QNP 1H/13  
 PULPROG zgpg30  
 TD 65536  
 SOLVENT CDCl3  
 NS 32  
 DS 2  
 SWH 23980.814 Hz  
 FIDRES 0.365918 Hz  
 AQ 1.3664756 sec  
 RG 4096  
 DW 20.850 usec  
 DE 6.00 usec  
 TE 295.2 K  
 D1 2.0000000 sec  
 d11 0.0300000 sec  
 DELTA 1.89999998 sec  
 TD0 1

==== CHANNEL f1 =====  
 NUC1 13C  
 P1 8.00 usec  
 PL1 -2.60 dB  
 SFO1 100.6228298 MHz

==== CHANNEL f2 =====  
 CPDPRG2 waltz16  
 NUC2 1H  
 PCPD2 80.00 usec  
 PL2 -1.50 dB  
 PL12 17.50 dB  
 PL13 17.50 dB  
 SFO2 400.1316005 MHz

F2 - Processing parameters  
 SI 32768  
 SF 100.6127690 MHz  
 WDW EM  
 SSB 0  
 LB 1.00 Hz  
 GB 0  
 PC 1.40

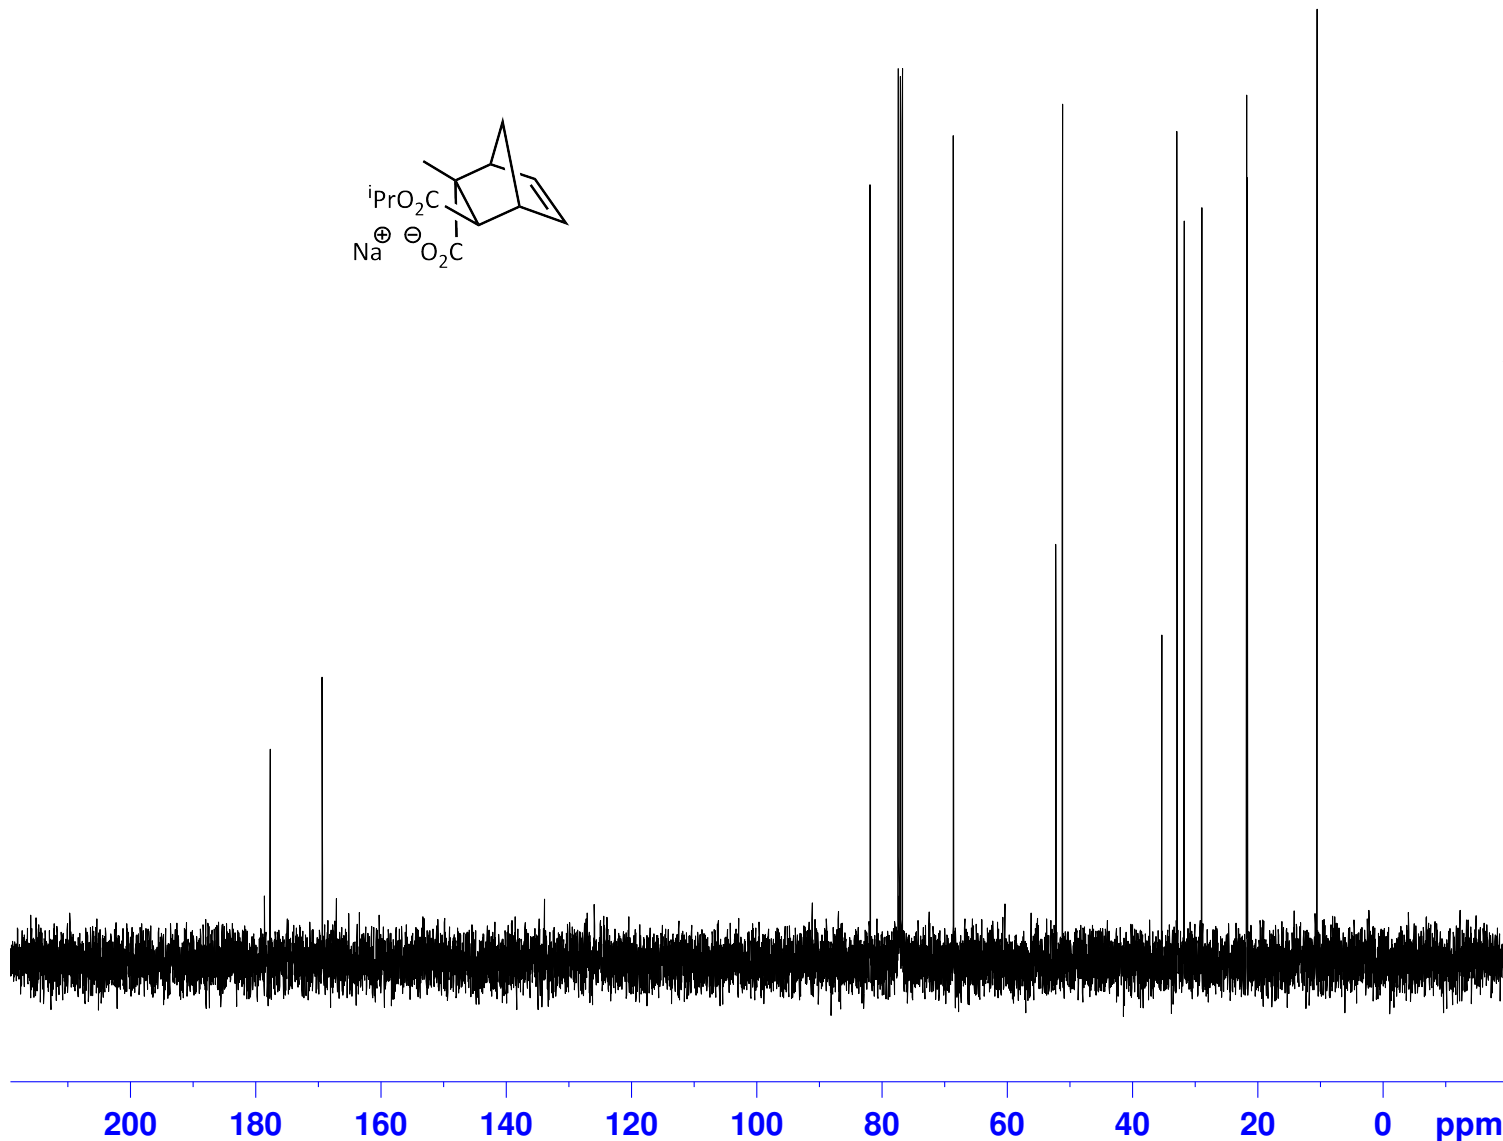

Current Data Parameters  
 Name: mch-2604-2002  
 PROCNO: 1  
 F2 - Acquisition Parameters  
 Date\_: 20021204  
 Time: 12.00  
 INSTRUM: AV360  
 PULPROG: zgpg30  
 TO: 32768  
 SOLVENT: CDC13  
 NS: 16  
 DS: 2  
 SWH: 7440.476 Hz  
 FIDRES: 0.227085 Hz  
 AQ: 2.2020595 sec  
 SFO1: 360.1322240 MHz  
 ZM: 67.200 usec  
 JE: 6.00 usec  
 TE: 300.0 K  
 D1: 0.10000000 sec

\*\*\*\*\* CHANNEL f1 \*\*\*\*\*  
 NUC1: 13C  
 P1: 11.60 usec  
 PL1: 1.00 dB  
 SFO1: 360.1322240 MHz

F2 - Processing parameters  
 SI: 32768  
 SF: 360.1300293 MHz  
 WPC: 0  
 SSB: 0  
 LB: 0.30 Hz  
 GB: 0  
 PC: 4.00

10 NMR plot parameters  
 SI: 32768  
 SF: 360.1300293 MHz  
 CY: 21.50 cm  
 F1: 11.60000000  
 F2: 4177.51 Hz  
 F3: -0.40000000  
 F4: -144.05 Hz  
 PPM0: 0.32286 ppm/cm  
 FWHM: 123.47315 Hz/cm

1.9741  
 1.9568  
 1.9394  
 1.9219  
 1.9044  
 1.8900  
 1.8732  
 1.8552  
 1.8493  
 1.8083  
 1.8017  
 1.447  
 1.1402  
 1.0954  
 1.0885  
 1.0845  
 1.0896  
 1.0839  
 1.0502  
 1.0487  
 1.0487  
 2.5857  
 2.5762  
 2.5650  
 0.746  
 2.3088  
 1.921  
 1.9159  
 1.7594  
 1.7560  
 1.7277  
 1.7233  
 1.458  
 1.3087  
 1.2969  
 1.2809  
 1.2412  
 1.2240  
 1.1988  
 1.1878  
 1.1815  
 1.1704  
 1.1608  
 1.1538  
 1.1413  
 1.1367

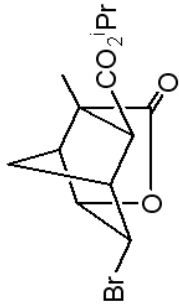

7.1976

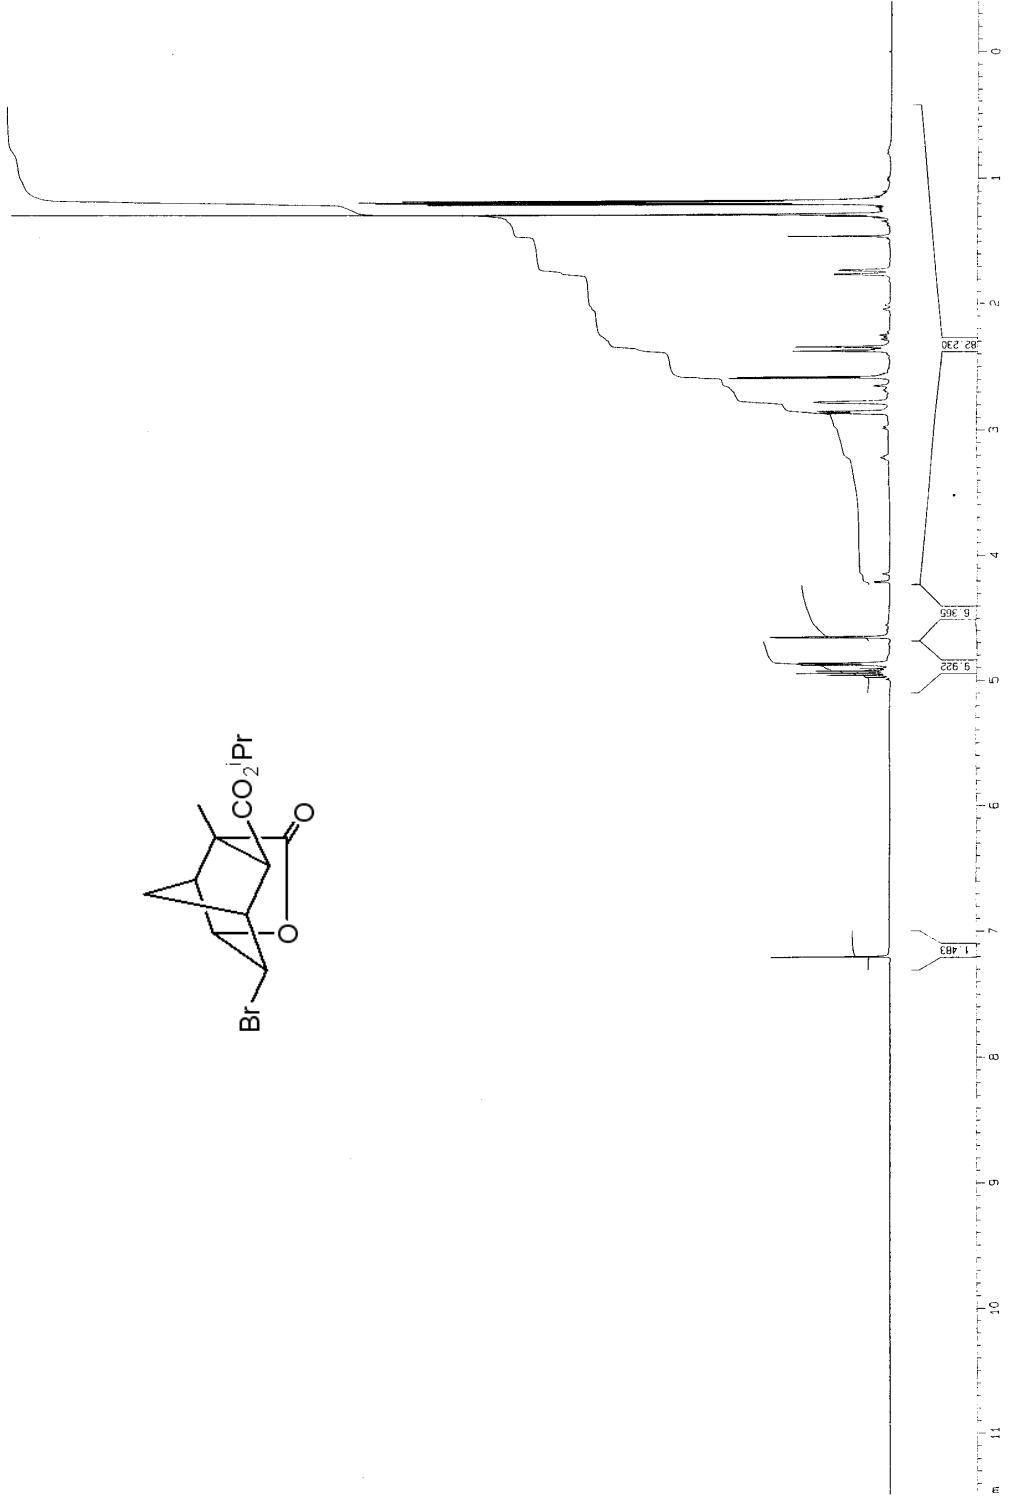

Current Data Parameters  
 NAME mch-Ec04-2002  
 EXPNO 2  
 PROCNO 1

F2 - Acquisition Parameters  
 Date\_ 20020825  
 Time 14:25  
 INSTRUM AV360  
 PROBO 5 mm QNP 1H/1  
 PULPROG zgpg30  
 TD 65536  
 SOLVENT CDCl3  
 NS 640  
 DS 4  
 SWH 27173.912 Hz  
 FIDRES 0.414641 Hz  
 AQ 1.2059124 sec  
 RG 40  
 DB 11585.2  
 JC 19.400 usec  
 JE 6.00 usec  
 TE 300.2 K  
 DE 11.0000000 sec  
 DF 0.03000000 sec  
 EI 0.00000000 sec  
 SI 2

\*\*\*\*\* CHANNEL f1 \*\*\*\*\*  
 NUC1 13C  
 P1 1.00 usec  
 PL 0.00 dB  
 SFO1 90.563626 MHz

\*\*\*\*\* CHANNEL f2 \*\*\*\*\*  
 CPDPRG2 waltz16  
 NUC2 1H  
 P2 80.00 usec  
 PL2 19.00 dB  
 PL12 17.77 dB  
 SFO2 350.1314025 MHz

F2 - Processing parameters  
 SI 32768  
 SF 90.563626 MHz  
 DS 4  
 SWH 0  
 GB 0  
 PC 1.40

10 NMR pilot parameters  
 CA 30.00 cm  
 CB 30.00 cm  
 CP 215.000 ppm  
 F1 19459.27 Hz  
 F2 -5.000 ppm  
 F2 -452.77 Hz  
 SHCN 6.28571 ppm/cm  
 XCN 565.40111 Hz/cm

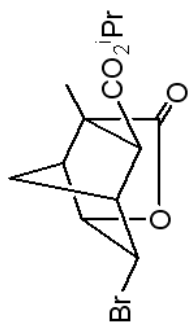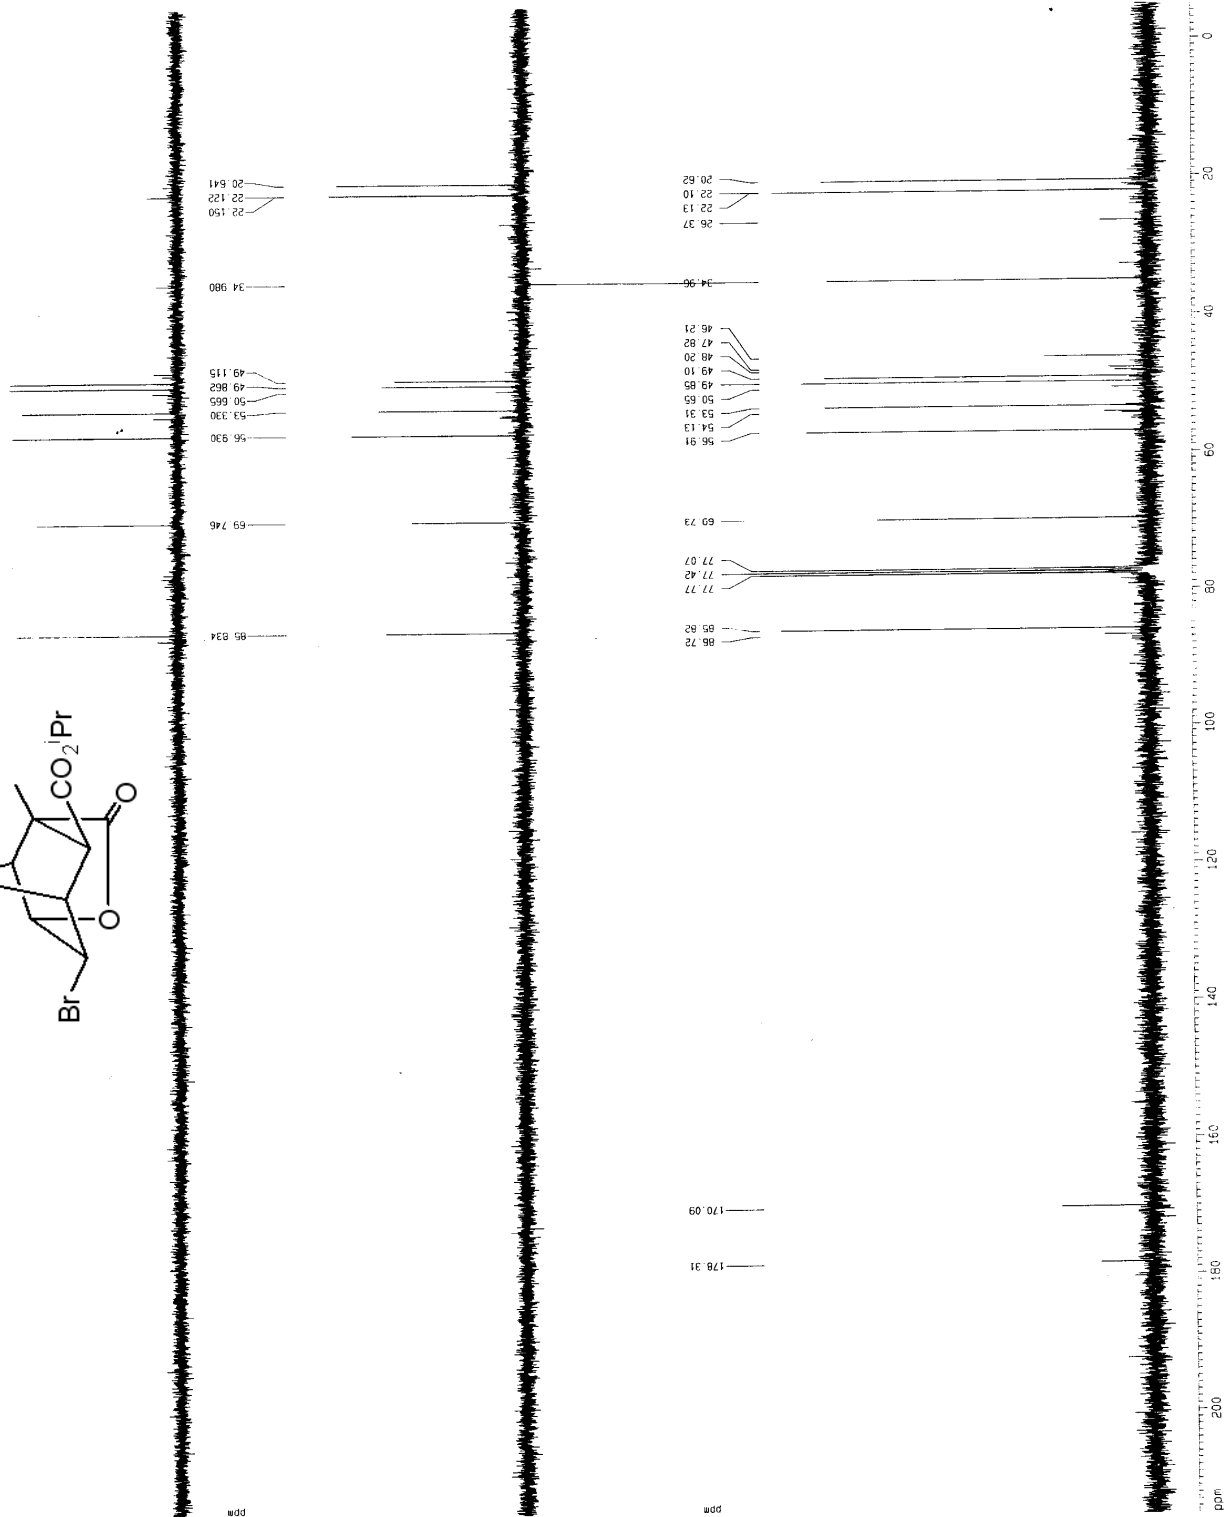

tricyclane  
 proton.k CDC13 {C:\bruker\xwin-nmr} ka 8

Current Data Parameters  
 Name ka-Apr-03-2002  
 EXPNO 1  
 PROCNO 1  
 F2 - Acquisition Parameters  
 Date\_ 20020403  
 Time 11.23  
 INSTRUM AV360  
 PROBHD 5 mm QNP 1H/1  
 PULPROG zgpg30  
 SOLVENT CDC13  
 NS 16  
 DS 2  
 SWH 7440.476 Hz  
 FIDRES 0.227085 Hz  
 AQ 2.202095 sec  
 RG 675.3  
 CM 675.3  
 SFO1 300.1322340 MHz  
 TE 300.0 K  
 D1 0.10000000 sec  
 \*\*\*\*\* CHANNEL f1 \*\*\*\*\*  
 NUC1 1H  
 P1 14.00 usec  
 PL1 0.00 dB  
 SFO1 300.1322340 MHz  
 F2 - Processing parameters  
 SI 16384  
 SF 360.1300000 MHz  
 EQ  
 SSB 0.30 Hz  
 LB 0  
 GB 4.00  
 PC  
 ID NMR plot parameters  
 CX 35.00 cm  
 CY 2.00 cm  
 CZ 2.00 cm  
 FID 11.800 ppm  
 F1 4377.51 Hz  
 F2 -0.400 ppm  
 F3 -144.05 Hz  
 GAMMA 0.34286 DDP/cm  
 WCN 123.47314 Hz/cm

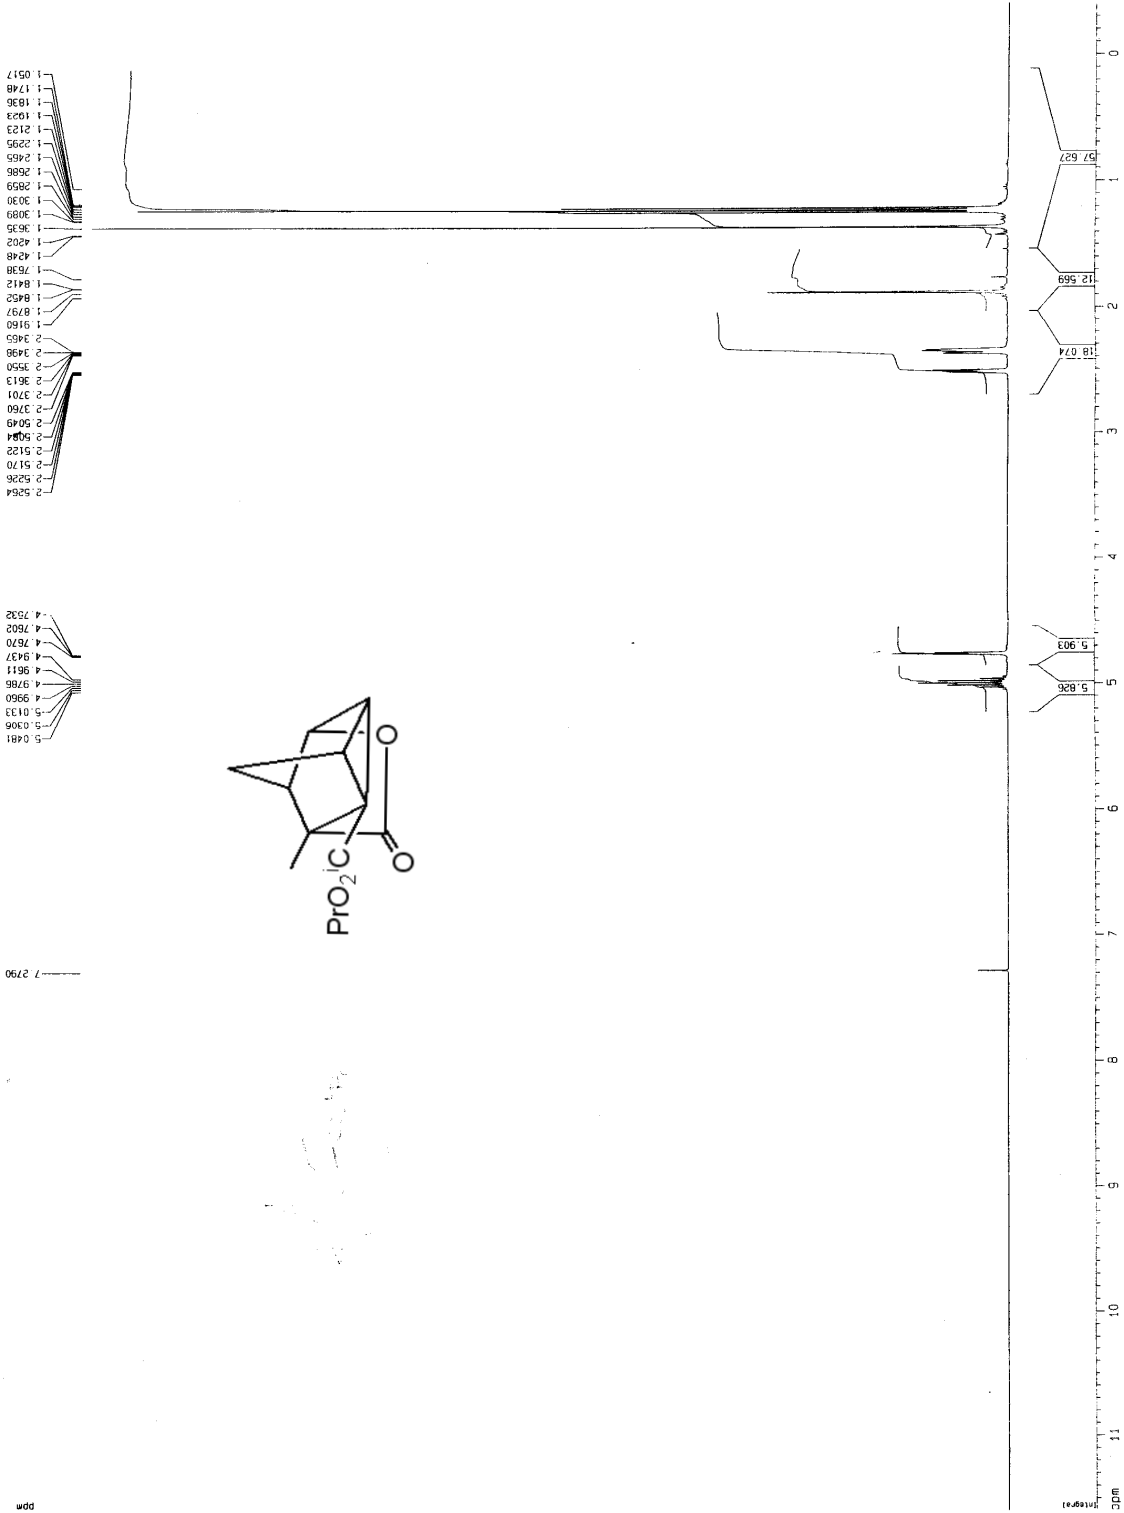

1.0517  
1.1748  
1.1836  
1.1932  
1.2123  
1.2295  
1.2465  
1.2686  
1.2859  
1.3030  
1.3089  
1.3676  
1.4202  
1.4748  
1.7638  
1.8412  
1.8452  
1.8797  
1.9180  
1.9455  
2.1498  
2.3505  
2.3613  
2.3701  
2.3760  
2.5049  
2.5094  
2.5128  
2.5170  
2.5264

4.7322  
4.7802  
4.7870  
4.9437  
4.9611  
4.9786  
4.9960  
5.0133  
5.0306  
5.0481

7.2790

ppm

tricyclane  
c13cpdno.k CDC13 (C:\bruker\Xwin-nmr) ka 57

Current Data Parameters  
 NAME k3-Apr03-2002  
 EXPNO 5  
 PROCNO 1  
 F2 - Acquisition Parameters  
 Date\_ 20020604  
 Time 0:10  
 INSTRUM AV360  
 PROBHD 5 mm QNP 1H/1  
 PULPROG zgpg30  
 TD 65536  
 SOLVENT CDCl3  
 NS 648  
 DS 4  
 SWH 27173.912 Hz  
 FIDRES 0.414641 Hz  
 AQ 1.20059124 sec  
 RG 114  
 JW 400.000000  
 F2 400.146000 MHz  
 TE 300.0 K  
 D1 0.01000000 sec  
 d11 0.03000000 sec  
 d12 0.00020000 sec

\*\*\*\*\* CHANNEL f1 \*\*\*\*\*  
 NUC1 13C  
 P1 12.00 usec  
 PL1 0.00 dB  
 SFO1 90.5646860 MHz

\*\*\*\*\* CHANNEL f2 \*\*\*\*\*  
 CPDPRG2 waltz16  
 NUC2 1H  
 P2 8.00 usec  
 PL2 0.00 dB  
 PL12 21.00 dB  
 PL13 120.00 dB  
 SFO2 360.1314405 MHz

F2 - Processing parameters  
 F1 99.268 MHz  
 SF 90.55728 MHz  
 NDM 0  
 EN 0  
 SSB 0  
 -B 1.00 Hz  
 GB 0  
 PC 1.40

G3 NMR d1st parameters  
 CY 35.00 cm  
 CX 18.70 cm  
 F1P 215.000 ppm  
 F1 194.6927 Hz  
 F2P -5.000 ppm  
 F2 -482.77 Hz  
 -PHCK 6.28871 ppm/cm  
 -LEN 589.20111 Hz/cm

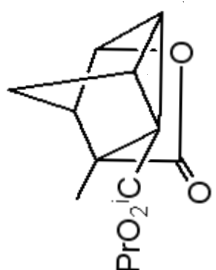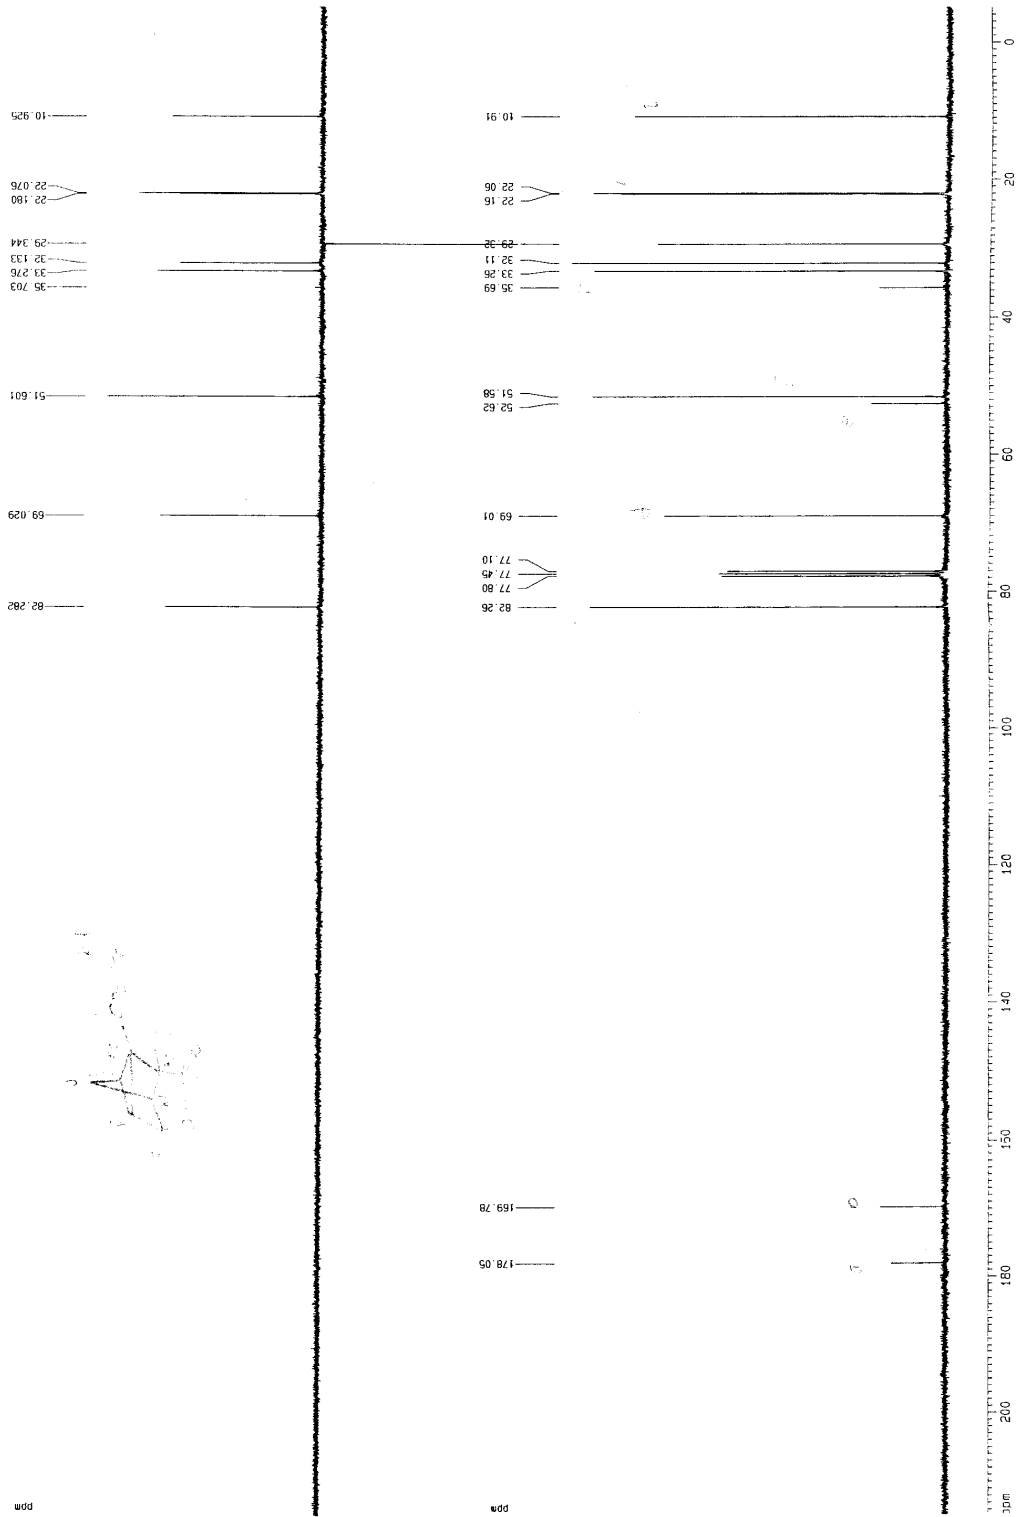



LLE-6.Proton

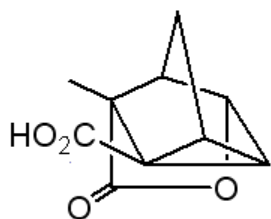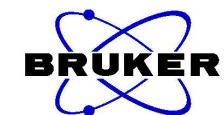

Current Data Parameters  
NAME LLE110713  
EXPNO 10  
PROCNO 1  
  
F2 - Acquisition Parameters  
Date\_ 20110713  
Time 10.53  
INSTRUM DPX400  
PROBHD 5 mm QNP 1H/13  
PULPROG zg30  
TD 32768  
SOLVENT DMSO  
NS 16  
DS 2  
SWH 8278.146 Hz  
FIDRES 0.252629 Hz  
AQ 1.9792372 sec  
RG 256  
DW 60.400 usec  
DE 6.00 usec  
TE 294.2 K  
D1 1.00000000 sec  
TD0 1

==== CHANNEL f1 =====  
NUC1 1H  
P1 10.00 usec  
PL1 -1.50 dB  
SF01 400.1324710 MHz

F2 - Processing parameters  
SI 16384  
SF 400.1300000 MHz  
WDW EM  
SSB 0  
LB 0.30 Hz  
GB 0  
PC 1.40

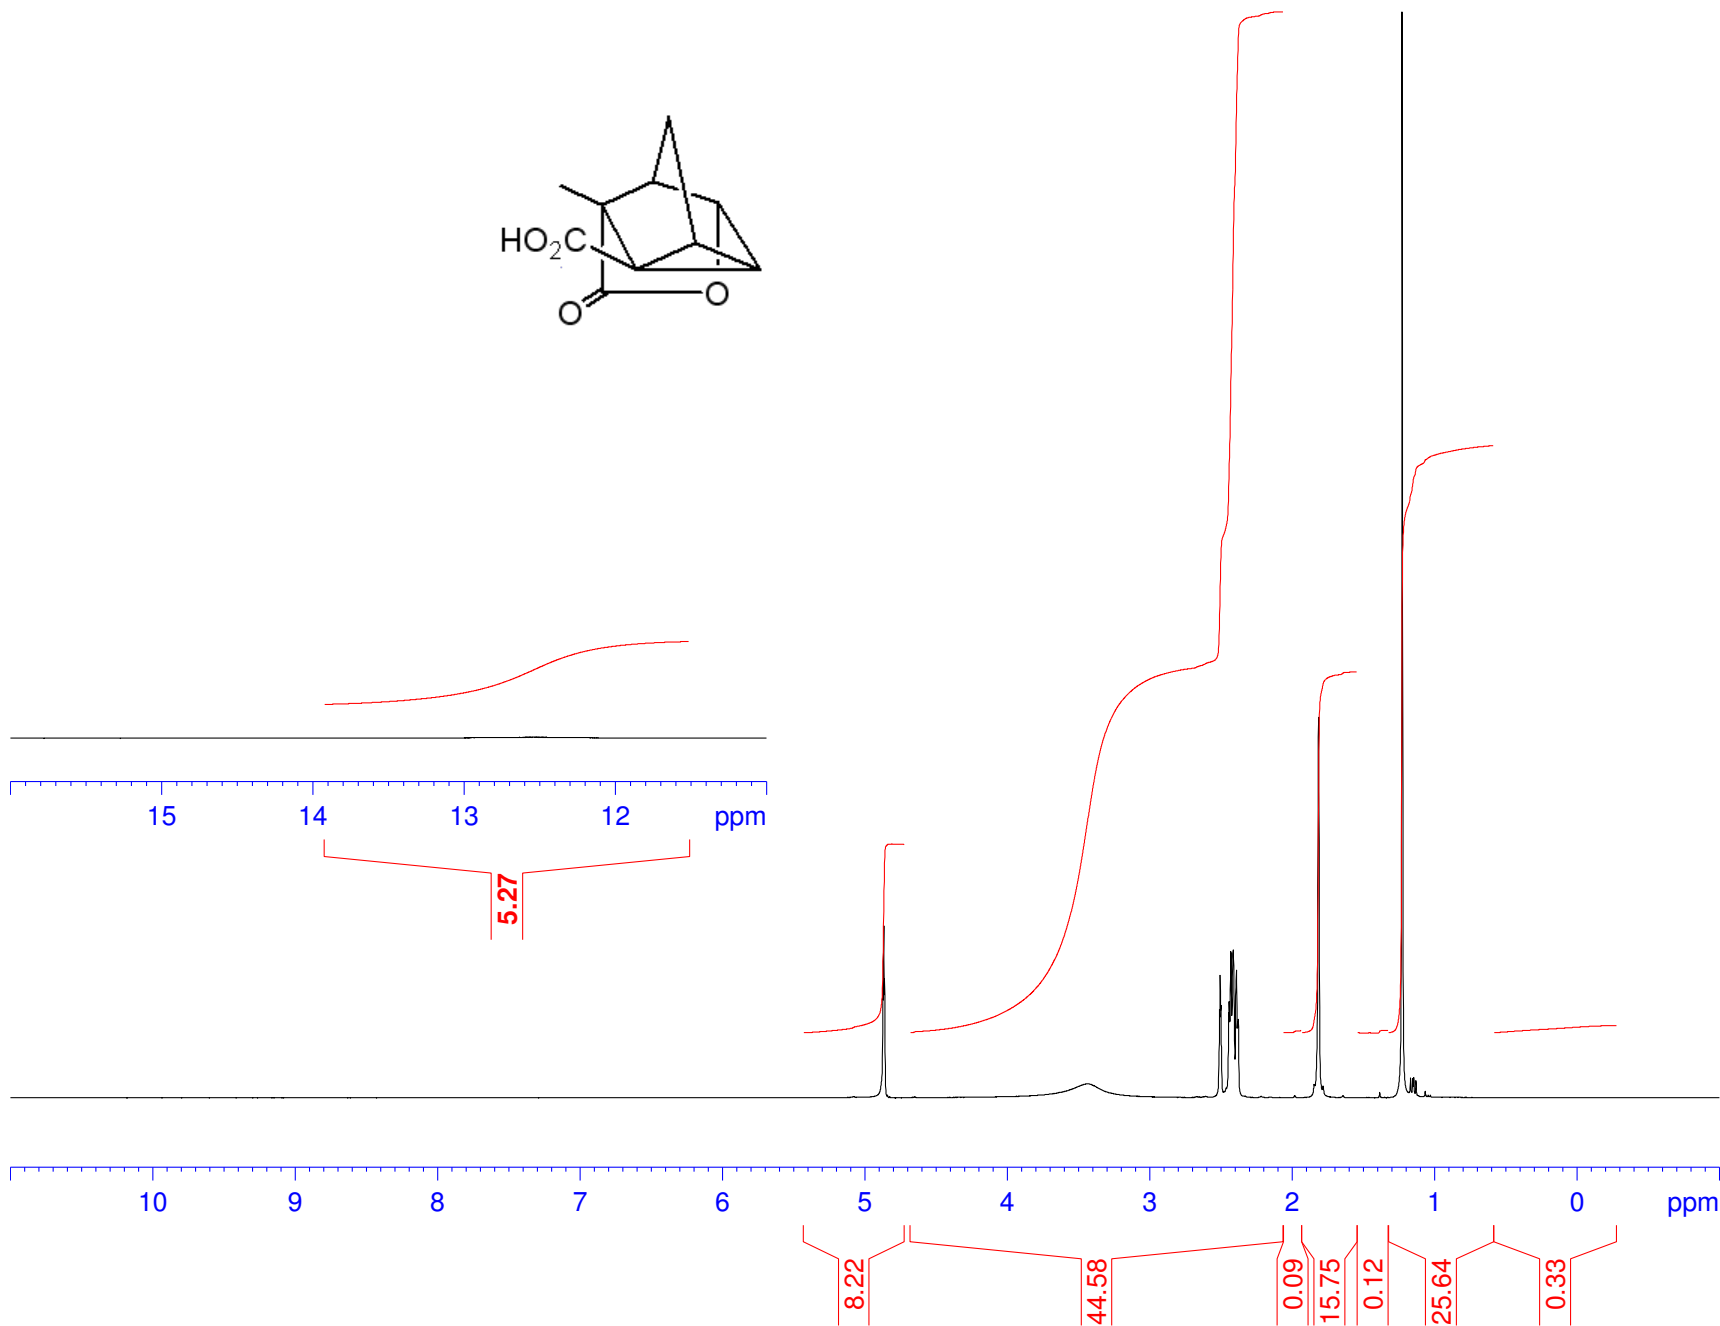

LLE-6. Carbon DEPT

177.64  
171.28

81.73

51.62  
50.40  
40.07  
39.86  
39.65  
39.44  
39.23  
39.02  
38.81  
34.48  
32.09  
31.42  
28.42  
21.45  
10.05

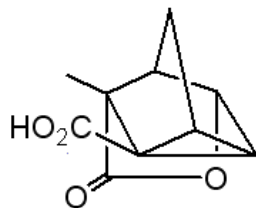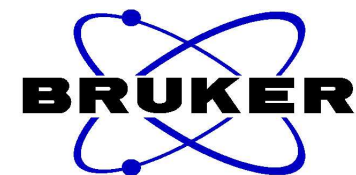

Current Data Parameters  
 NAME LLE110713  
 EXPNO 11  
 PROCNO 1

F2 - Acquisition Parameters  
 Date\_ 20110713  
 Time 11.23  
 INSTRUM DPX400  
 PROBHD 5 mm QNP 1H/13  
 PULPROG deptq\_135  
 TD 65536  
 SOLVENT DMSO  
 NS 512  
 DS 4  
 SWH 23980.814 Hz  
 FIDRES 0.365918 Hz  
 AQ 1.3664756 sec  
 RG 11585.2  
 DW 20.850 usec  
 DE 6.00 usec  
 TE 294.2 K  
 CNST2 145.0000000  
 D1 2.0000000 sec  
 d2 0.00344828 sec  
 D11 0.03000000 sec  
 DELTA 0.00001019 sec

==== CHANNEL f1 =====  
 NUC1 13C  
 P1 8.00 usec  
 P2 16.00 usec  
 PL1 -2.60 dB  
 SFO1 100.6228300 MHz

==== CHANNEL f2 =====  
 CPDPRG2 waltz16  
 NUC2 1H  
 P3 10.00 usec  
 P4 20.00 usec  
 PCPD2 80.00 usec  
 PL2 -1.50 dB  
 PL12 17.50 dB  
 SFO2 400.1316000 MHz

F2 - Processing parameters  
 SI 32768  
 SF 100.6128193 MHz  
 WDW EM  
 SSB 0  
 LB 1.00 Hz  
 GB 0  
 PC 1.40

200 180 160 140 120 100 80 60 40 20 0 ppm

NV3/2.A9-B8  
 proton.k CDC13 [C:\bruker\xwin-nmr] nv 21

Current Data Parameters  
 NAME nv-3662-2003  
 EXPNO 1  
 PROCNO 1  
 F2 - Acquisition Parameters  
 Date\_ 20030923  
 Time 11:17  
 INSTRUM AV360  
 PROBM4C 5 mm QNP 1H/1  
 PULPROG zg30  
 TD 32768  
 SOLVENT CDC13  
 NS 12  
 DS 2  
 SWH 7440.476 Hz  
 FIDRES 0.227065 Hz  
 AQ 2.202895 sec  
 RG 143.7  
 SW 67.200 usec  
 ZG 3.00 usec  
 TE 300.0 K  
 DE 0.10000000 sec  
 ===== CHANNEL f1 =====  
 NUC1 1H  
 P1 11.60 usec  
 PL1 0.00 dB  
 SF01 360.1322246 MHz  
 F2 - Processing parameters  
 SI 16384  
 SF 360.1289945 MHz  
 MD 0  
 EM 0  
 GB 0  
 CB 0  
 PC 4.00  
 1D NMR plot parameters  
 CX 35.00 cm  
 CY 21.50 cm  
 F1 411.600 ppm  
 F2 -144.000 ppm  
 F3 -144.005 Hz  
 PRNCH 0.34286 ppm/cm  
 -ZCH 123.47314 Hz/cm

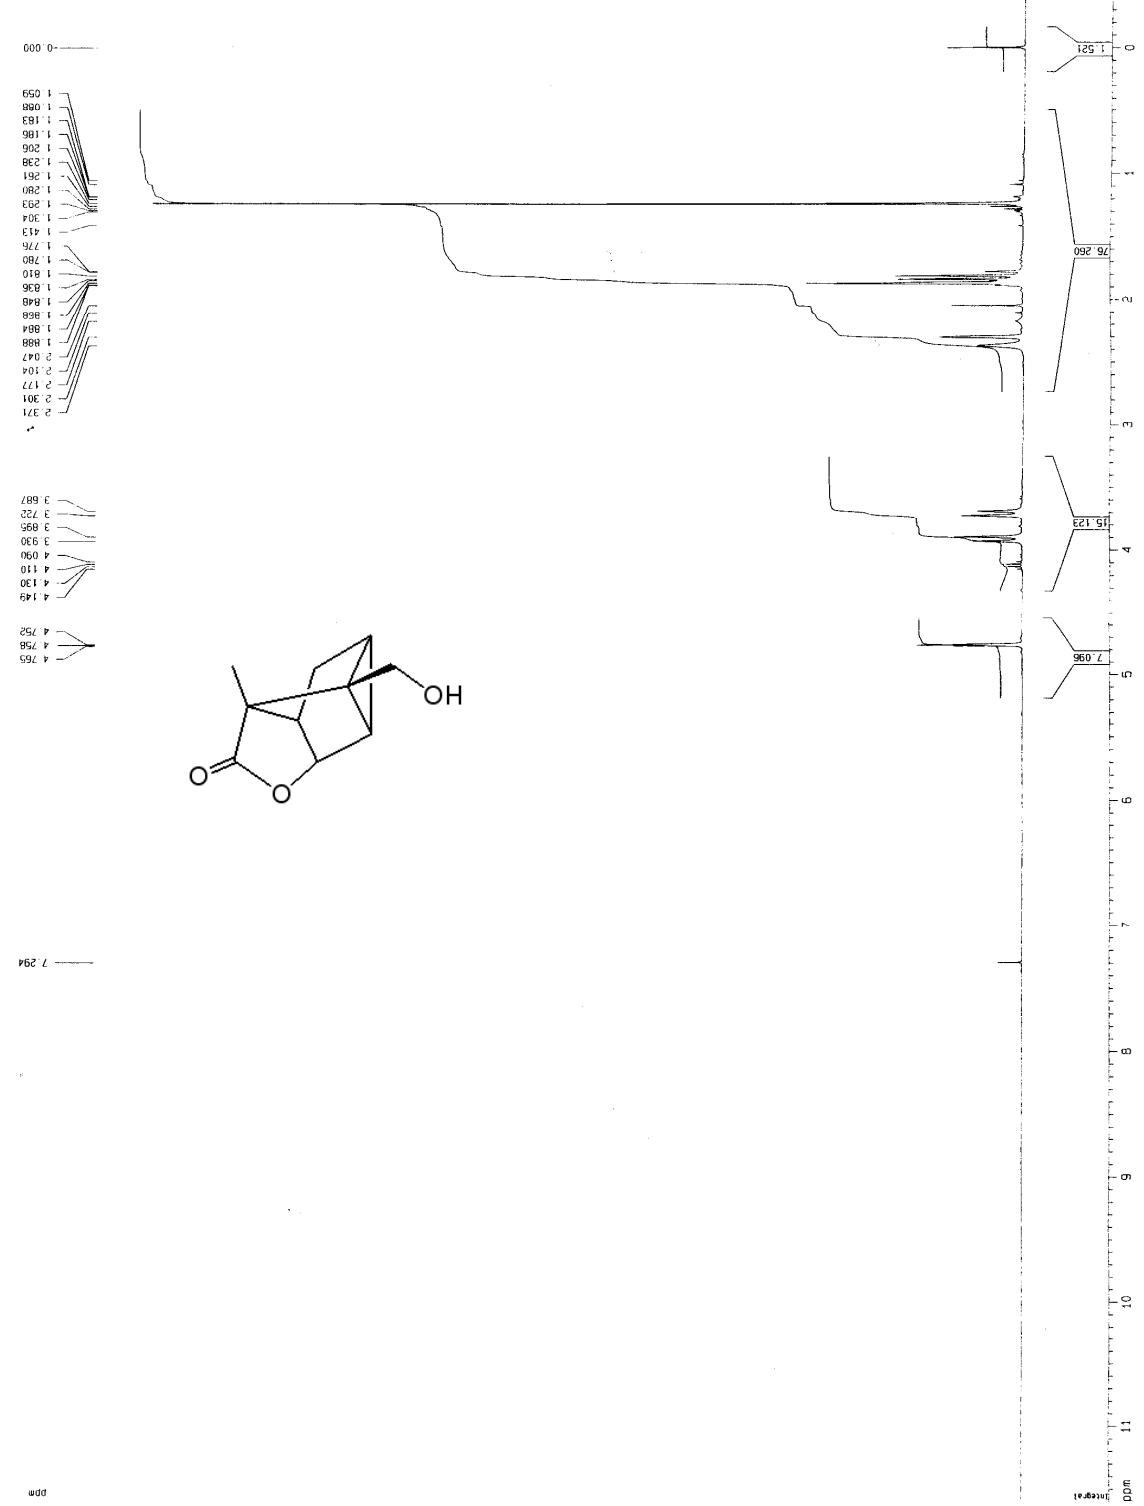

ppm

Current Data Parameters  
 NAME nv-Seq17-2003  
 EXPNO 3  
 PROCNO 1  
 F2 - Acquisition Parameters  
 Date\_ 20030917  
 Time 21:54  
 INSTRUM AV360  
 PROBHD 5 mm QNP 1H/1  
 PULPROG zgpg30  
 SOLVENT CDC13  
 NS 640  
 DS 4  
 SWH 27173.912 Hz  
 FIDRES 0.414641 Hz  
 AQ 1.2089524 sec  
 RG 327.5  
 DQ 149.000 usec  
 DE 6.00 usec  
 TE 300.0 K  
 D1 0.01000000 sec  
 d11 0.03000000 sec  
 d12 0.00002000 sec  
 ===== CHANNEL f1 =====  
 NUC1 13C  
 P1 13C  
 PL1 8.50 usec  
 PL1 6.00 dB  
 SFO1 90.564660 MHz  
 ===== CHANNEL f2 =====  
 CPDPRG2 waltz16  
 MWDW 80.00 usec  
 PCPD2 1.00 dB  
 PL12 17.77 dB  
 PL13 120.00 dB  
 SFO2 360.1314405 MHz  
 F2 - Processing parameters  
 SI 32768  
 SF 90.5547250 MHz  
 MDW EN  
 SSB 0  
 LB 1.00 Hz  
 GB 0  
 PC 1.40  
 ID NMR plot parameters  
 CX 35.00 cm  
 CY 8.70 cm  
 F1P 215 000 ppm  
 F1 19485.27 Hz  
 F2 500 000 ppm  
 F2 59671.12 Hz  
 GAMMA 13C/1H  
 FIDCM 569.20111 Hz/cm

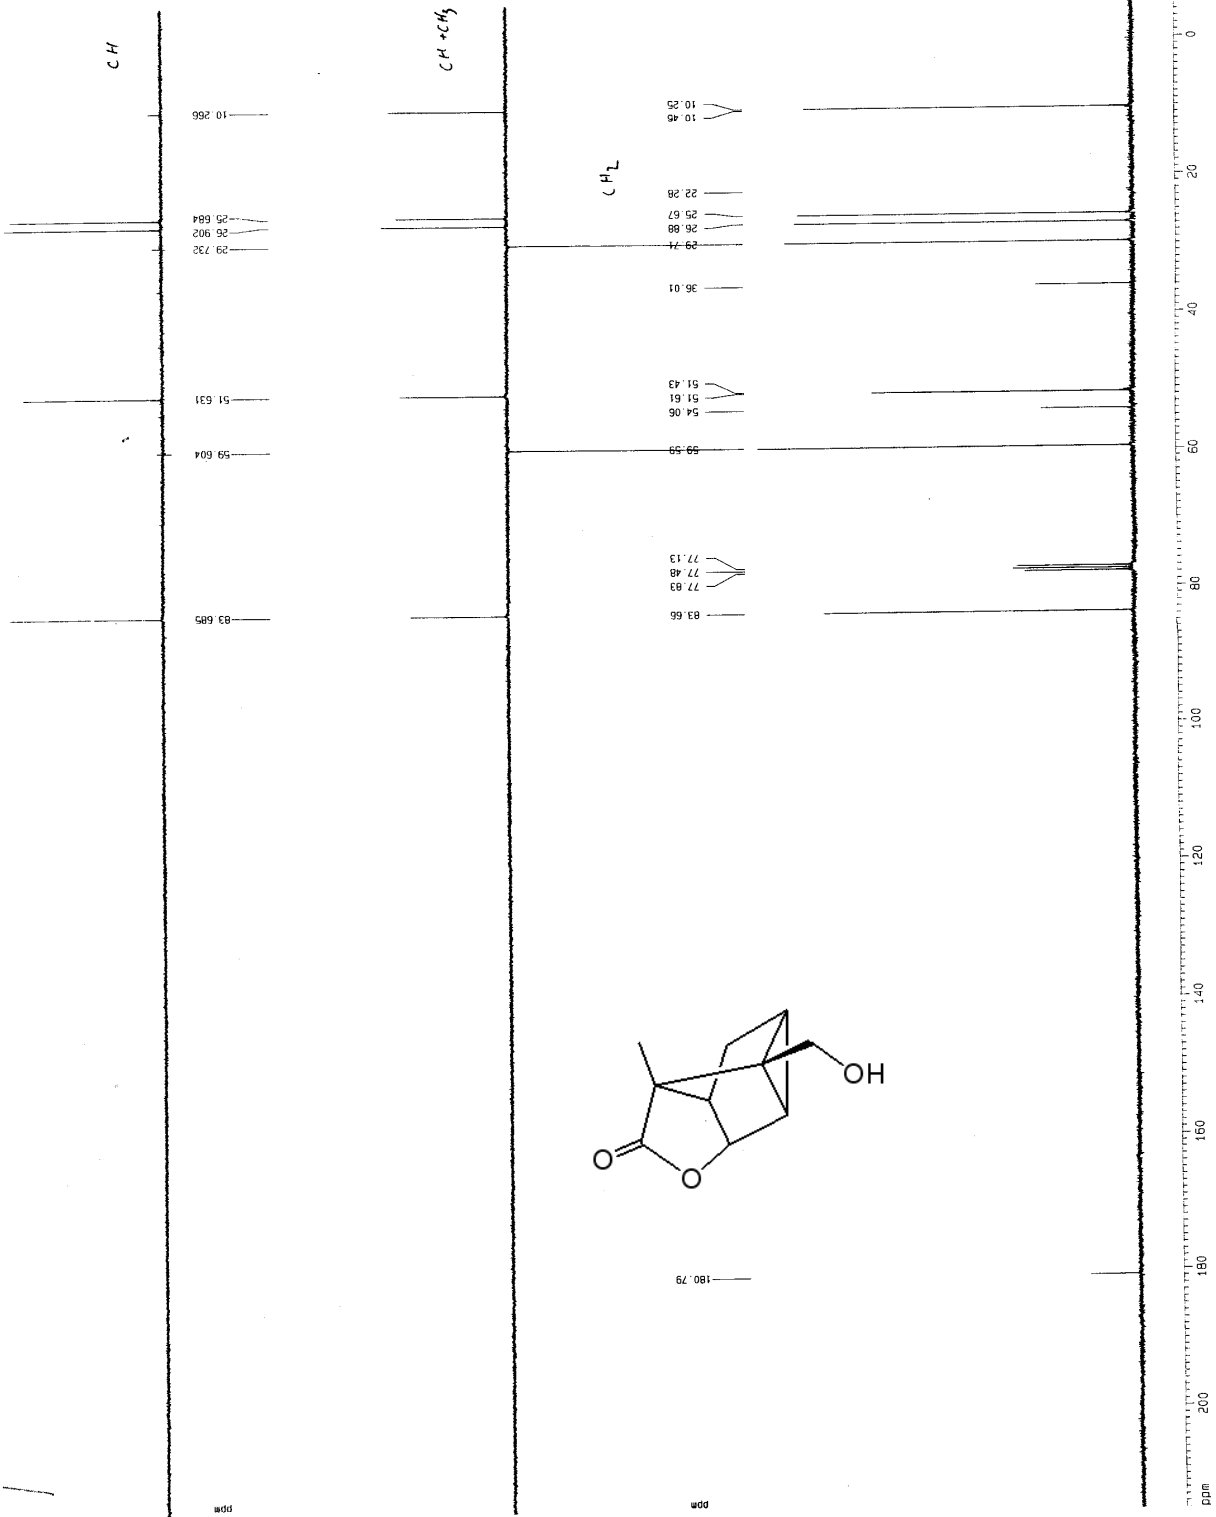

NV3/4.A9-C1  
 proton.k CDC13 (C:\bruker\xwin-nmr) nv 1

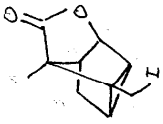

Current Data Parameters  
 NAME nv-5602-2003  
 EXPNO 2  
 PROCNO 1  
 F2 - Acquisition Parameters  
 Date\_ 20030822  
 Time 18 34  
 INSTRUM AV360  
 PROBHD 5 mm QNP 1H/1  
 PULPROG zgpg30  
 TO 32768  
 SOLVENT CDC13  
 NS 12  
 DS 2  
 SWH 7440.476 Hz  
 FIDRES 0.227065 Hz  
 AQ 2.2020595 sec  
 RG 362  
 DM 67.200 usec  
 DE 6.00 usec  
 TE 300.2 K  
 D1 0.10000000 sec  
 \*\*\*\*\* CHANNEL f1 \*\*\*\*\*  
 NUC1 1H  
 P1 11.60 usec  
 PL1 1.00 dB  
 SFO1 360.132240 MHz  
 F2 - Processing parameters  
 SI 16384  
 SF 360.1300024 MHz  
 WDW EM  
 SSB 0  
 GB 0.30 Hz  
 DC 4.00  
 1D NMR plot parameters  
 CX 35.00 cm  
 CY 21.50 cm  
 F1P 11.600 dB  
 F2P 11.600 dB  
 F3P -144.00 dB  
 F2 -144.00 Hz  
 PRNCH 0.34286 ppm/cm  
 AZCN 123.47314 Hz/cm

0.009  
0.008

1.120  
1.143  
1.243  
1.298  
1.354  
1.475  
1.626  
1.799  
1.833  
1.844  
1.847  
1.881  
1.950  
1.970  
1.985  
1.988  
2.391

3.383  
3.414  
3.488  
3.519

4.723  
4.729  
4.736

7.273

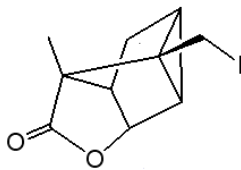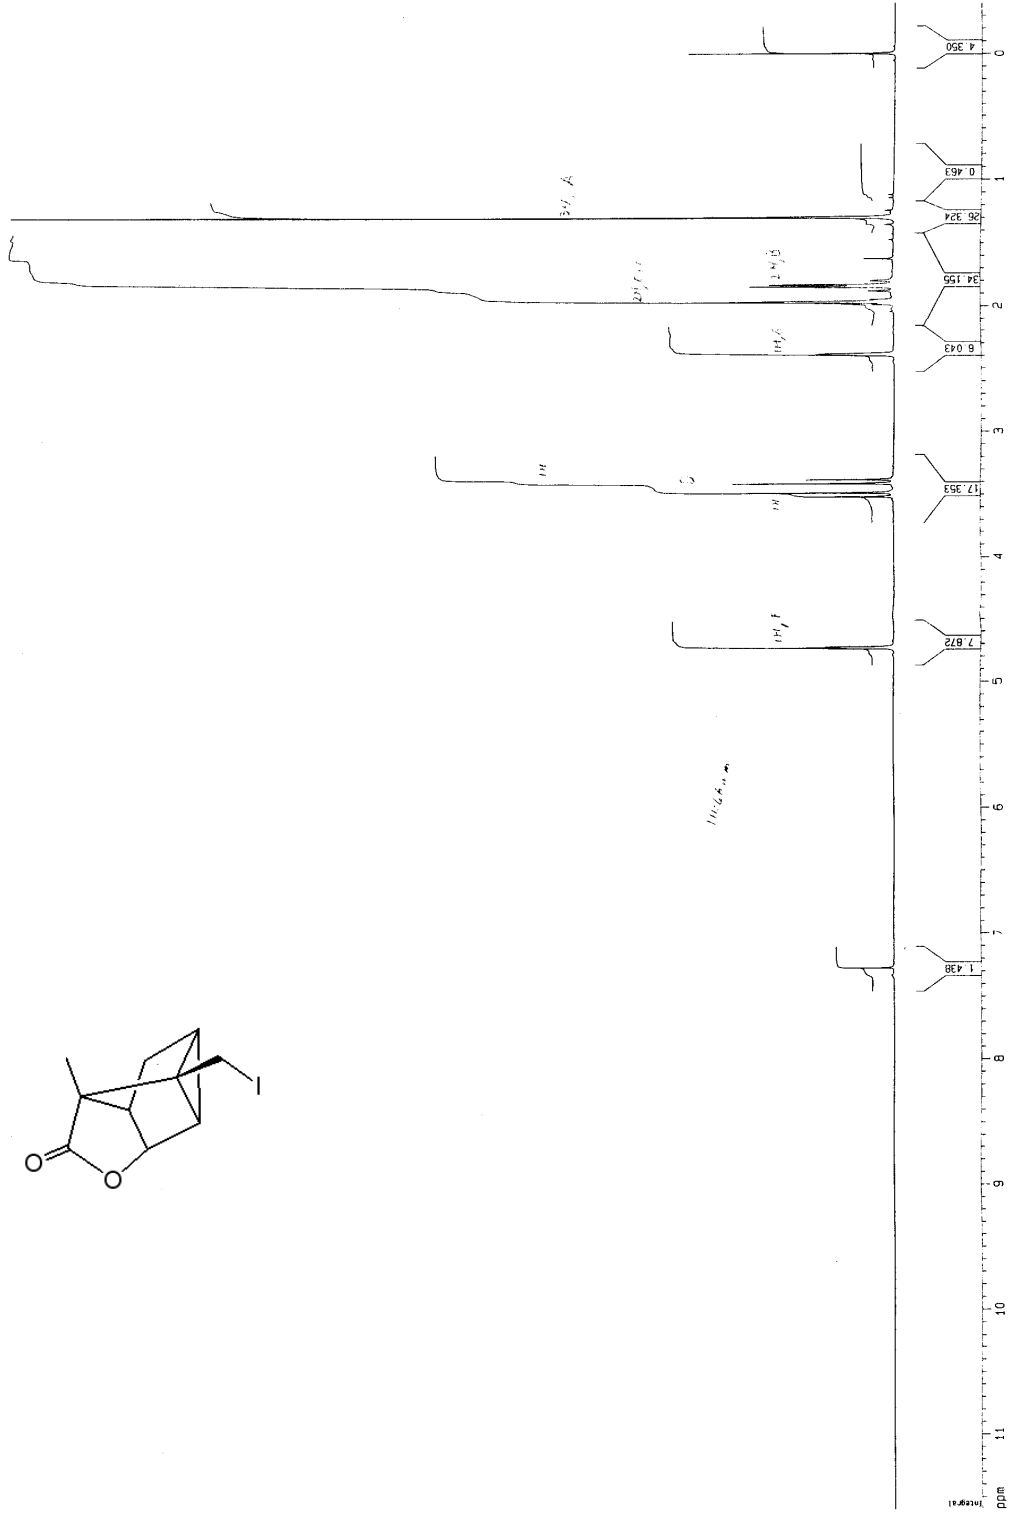

ppm

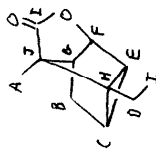

Current Data Parameters  
 NAME nv-56p2-2003  
 EXPNO 3  
 PROCNO 1  
 F2 - Acquisition Parameters  
 Date\_ 20030922  
 Time 21.19  
 INSTRUM AV360  
 PROBHD 5 mm QNP 1H/1  
 PULPROG zgpg30  
 TD 65536  
 SFO1 500.136093 MHz  
 SOLVENT CDCl3  
 NS 640  
 DS 4  
 SWH 27173.912 Hz  
 FIDRES 0.414641 Hz  
 AQ 1.2089124 sec  
 RG 14896.5  
 DQ 16.400 usec  
 DE 6.00 usec  
 TE 300.0 K  
 D1 0.01000000 sec  
 d11 0.03000000 sec  
 d12 0.00020000 sec

\*\*\*\*\* CHANNEL f1 \*\*\*\*\*  
 NUC1 13C  
 P1 6.50 usec  
 PL1 5.00 dB  
 SFO1 90.5648660 MHz

\*\*\*\*\* CHANNEL f2 \*\*\*\*\*  
 CDP222 meltz16  
 NUC2 1H  
 P2 80.00 usec  
 PL2 1.00 dB  
 PL12 17.77 dB  
 PL13 120.00 dB  
 SFO2 360.1314405 MHz

F2 - Processing parameters  
 SI 32768  
 SF 90.5648660 MHz  
 WDW EM  
 SSB 0  
 LB 1.00 Hz  
 GB 0  
 PC 1.40

1D NMR plot parameters  
 CQ 35.00 cm  
 CY 8.70 cm  
 F1 215.000 ppm  
 F1 19469.28 Hz  
 F2 -5.000 ppm  
 F2 -482.77 Hz  
 PRCM 6.28571 ppm/cm  
 HZCM 569.20150 Hz/cm

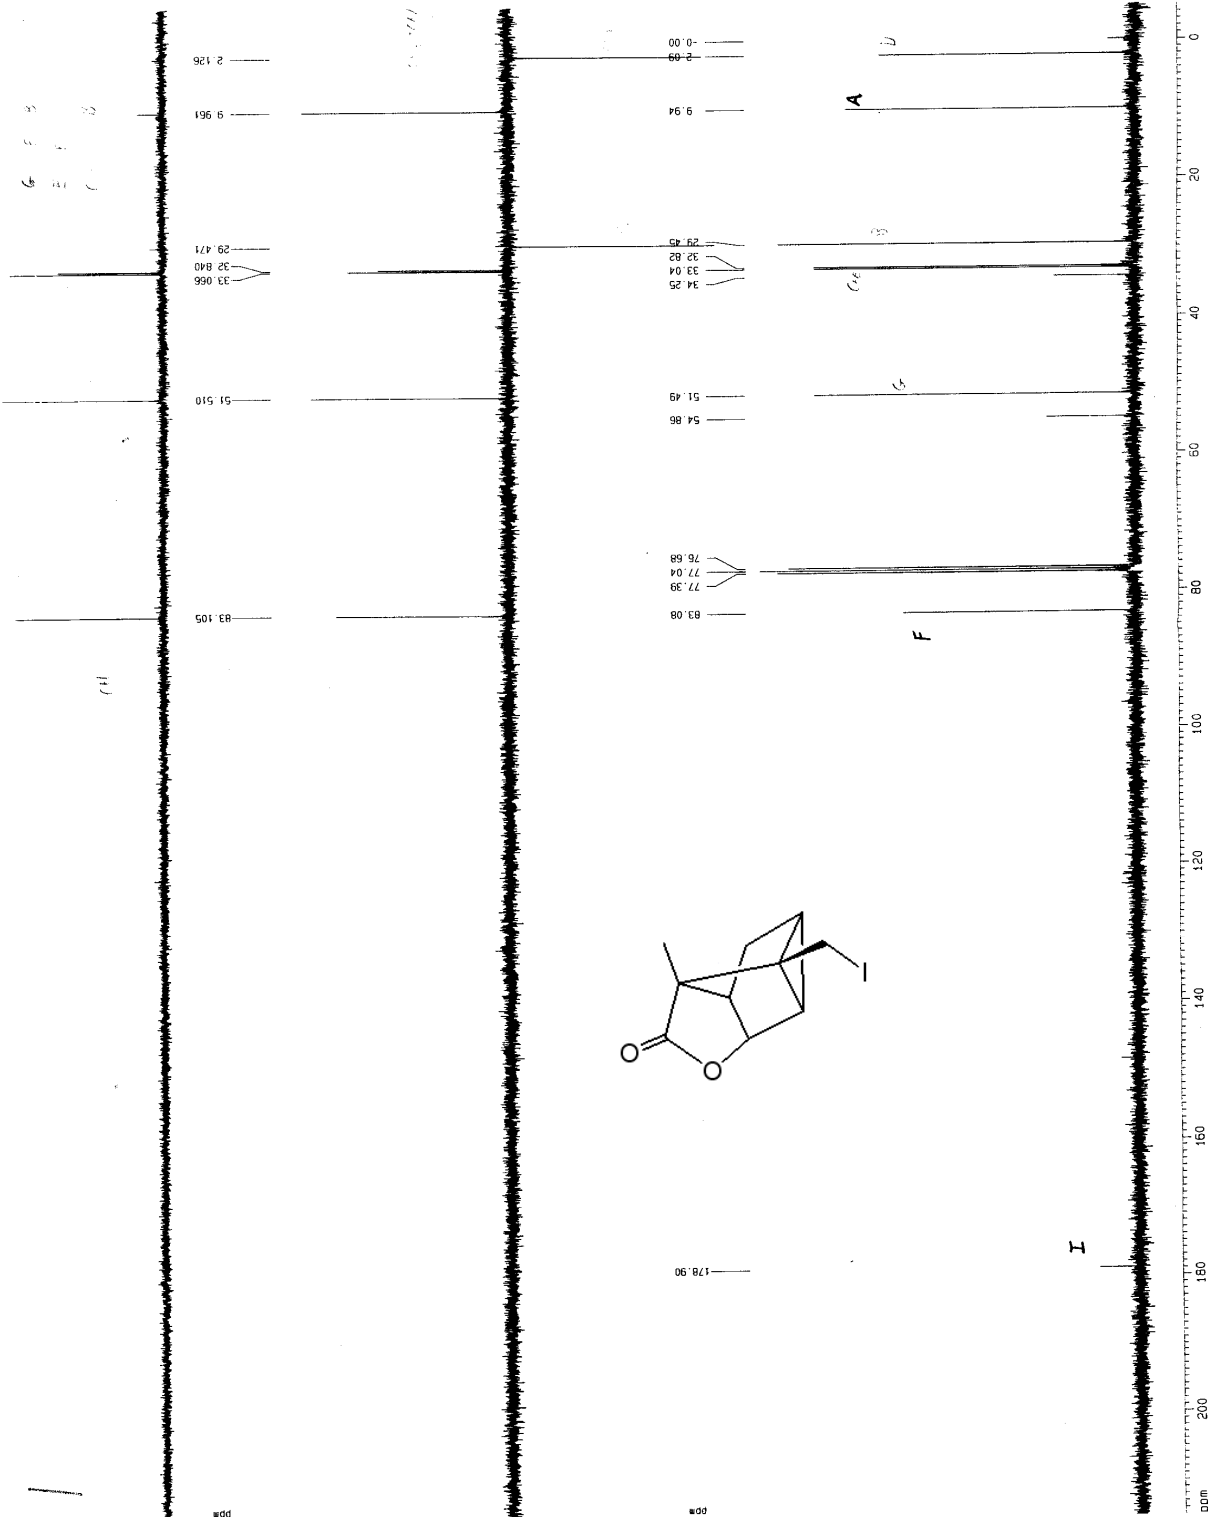

NV3/6 .03-C12  
 PROTON C0C13 (C:\u\ General 3

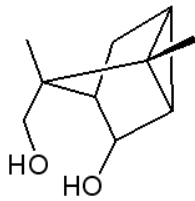

Current Data Parameters  
 NAME Sep30-2003-4\_3  
 EXPNO 1  
 PROCNO 1

F2 - Acquisition Parameters  
 Date\_ 20030930  
 Time 20.19  
 INSTRUM spect  
 PROBHD 5 mm QNP 1H/1  
 PULPROG zg30  
 TO 65536  
 SOLVENT C0C13  
 NS 16  
 DS 2  
 SWH 8278.146 Hz  
 FIDRES 0.126314 Hz  
 AQ 3.958243 sec  
 RG 45.3  
 DW 60.400 usec  
 DE 6.00 usec  
 TE 300.0 K  
 D1 1.00000000 sec

===== CHANNEL f1 =====  
 NUC1 1H  
 P1 9.00 usec  
 PL1 0.00 dB  
 SF01 400.1324710 MHz

F2 - Processing parameters  
 SI 32768  
 SF 400.1300073 MHz  
 EM  
 WDW EM  
 SSB 0  
 LB 0.30 Hz  
 GB 0  
 PC 6.00  
 1D NMR plot parameters  
 CX 20.00 cm  
 CY 12.50 cm  
 F1P 11.000 ppm  
 F1 4401.43 Hz  
 F2P -1.000 ppm  
 F2 -400.113 Hz  
 PPMCM 0.60000 ppm/cm  
 HZCM 240.07800 Hz/cm

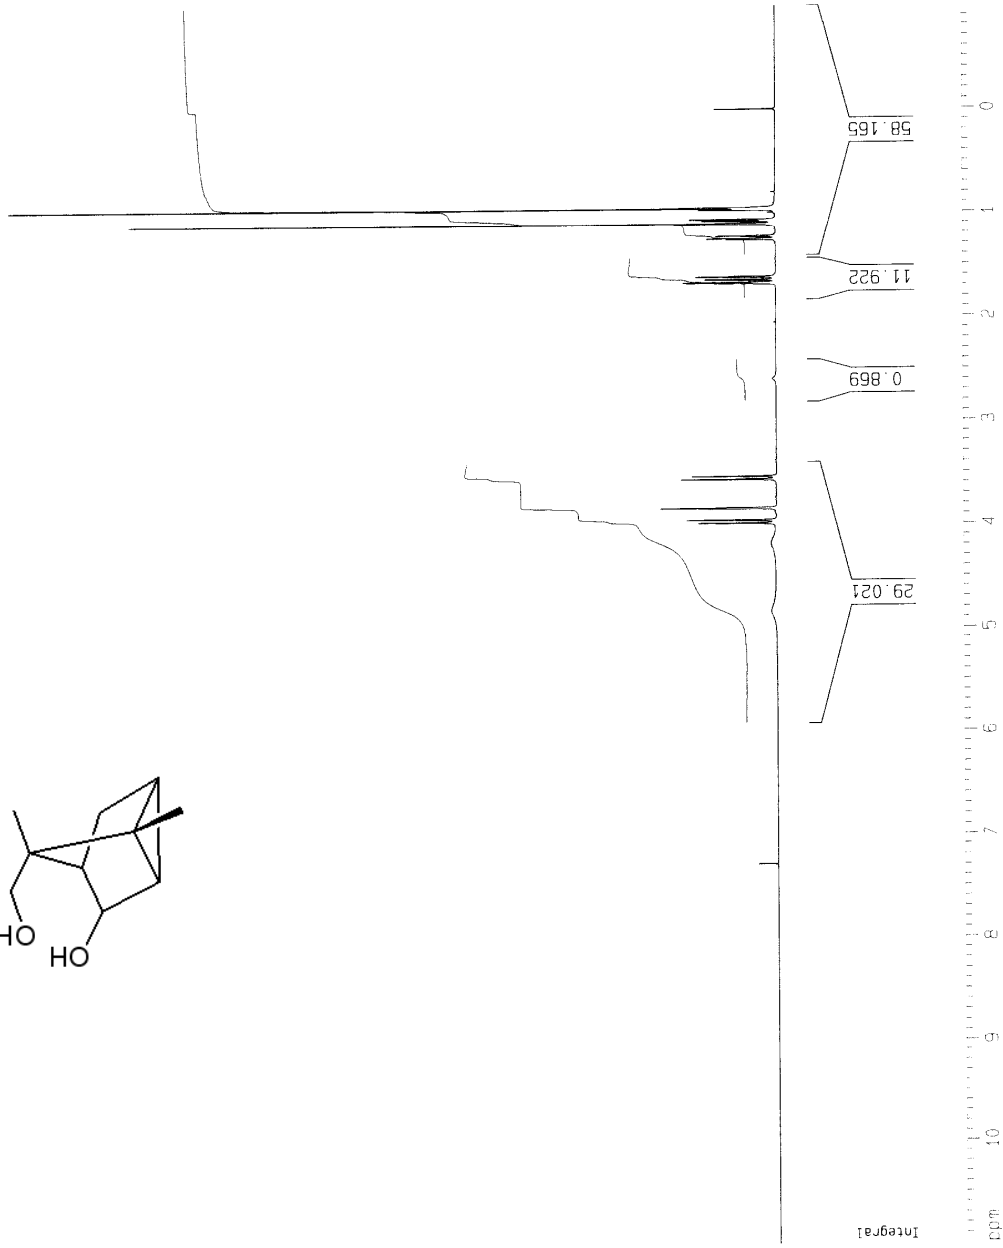

NV3/6.D3-C12  
 C13CPDONLY\_kc1 CDC13 (C:\u) General 3

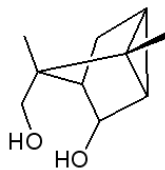

Current Data Parameters  
 NAME Sep-30-2003-4\_3  
 EXPNO 2  
 PROCNO 1

F2 - Acquisition Parameters

Date\_ 20030930  
 Time 20.31  
 INSTRUM spect  
 PROBHD 5 mm GNP 1H/1  
 PULPROG zgpg30  
 TD 65536  
 SOLVENT CDC13  
 NS 640  
 DS 4  
 SWH 31250.000 Hz  
 FIDRES 0.476837 Hz  
 AQ 1.0466259 sec  
 RG 1024  
 DM 16.000 usec  
 DE 6.00 usec  
 TE 300.0 K  
 D1 0.01000000 sec  
 d11 0.03000000 sec  
 d12 0.00002000 sec

==== CHANNEL f1 =====

NUC1 13C  
 P1 9.00 usec  
 PL1 6.00 dB  
 SF01 100.6237954 MHz

==== CHANNEL f2 =====

CPDPRG2 waltz16  
 NUC2 1H  
 PCPD2 80.00 usec  
 PL2 0.00 dB  
 PL12 19.00 dB  
 PL13 19.00 dB  
 SF02 400.1316005 MHz

F2 - Processing parameters

SI 32768  
 SF 100.6127684 MHz  
 WDM EM  
 SSB 0  
 LB 1.00 Hz  
 GB 0  
 PC 1.40

1D NMR plot parameters

CX 20.00 cm  
 CY 12.50 cm  
 F1P 220.000 ppm  
 F1 22134.81 Hz  
 F2P -1.000 ppm  
 F2 -100.64 Hz  
 PPMCM 11.05000 ppm/cm  
 HZCM 1111.77112 Hz/cm

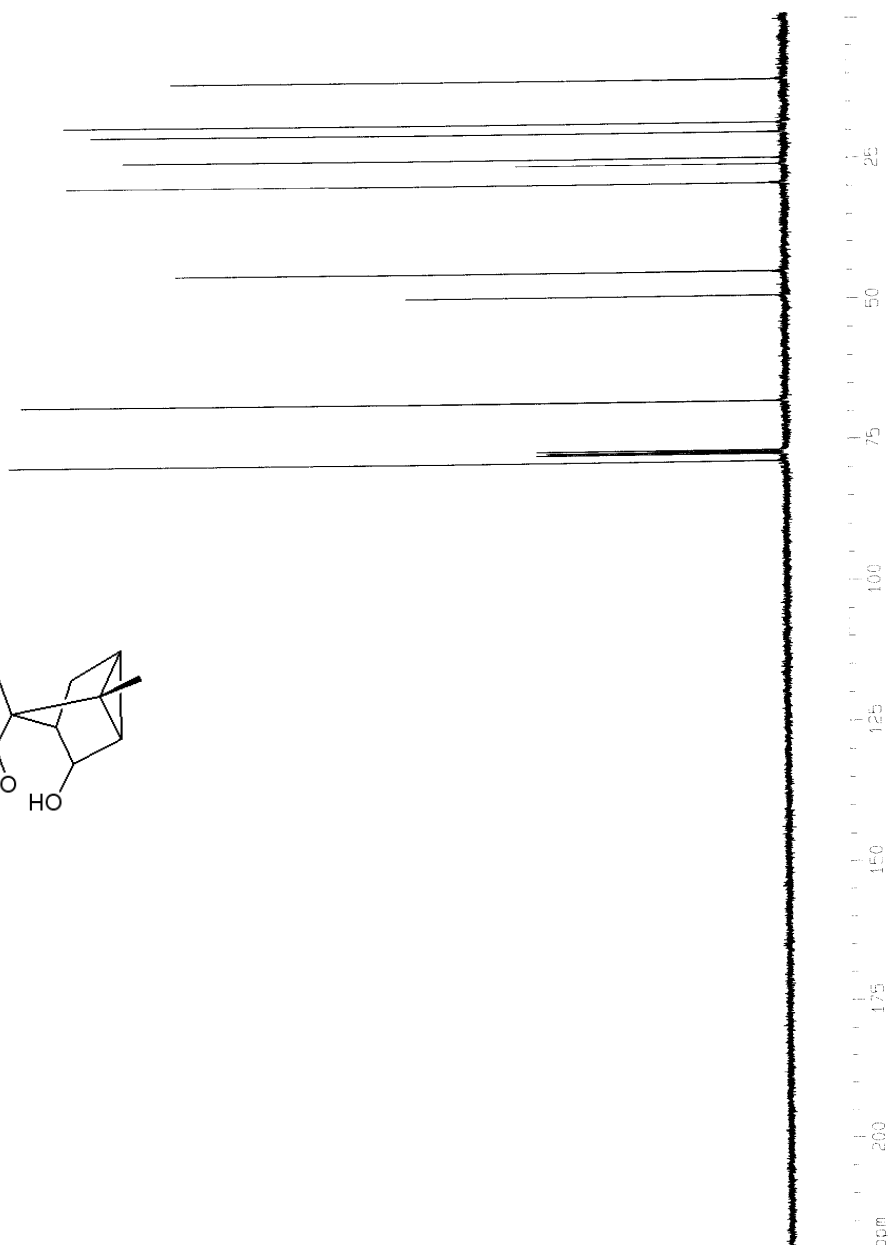



NV3/6.C8-D1  
 proton.k CDC13 [C:\bruker\xwin-nmr] nv 38

```

Current Data Parameters
NAME      NV3816F-2003
EXPNO    1
PROCNO    1

F2 - Acquisition Parameters
Date_     20030926
Time      15:29
Instrum   spect
PROBHD    5 mm QNP
PULPROG   zgpg30
TD        32768
SOLVENT   CDC13
NS         16
DS         2
SWH        7440.426 Hz
FIDRES     0.1600000 Hz
AQ         2.5262095 Sec
RG         128
JM         67.200 usec
DE         6.00 usec
TE         300.0 K
D1         0.10000000 sec

***** CHANNEL f1 *****
NUC1       1H
P1         11.60 usec
PL1        1.00 dB
SFO1       360.1322240 MHz

F2 - Processing parameters
SI         32768
SF         360.1300000 MHz
WDW        EM
SSB        0
LB         0.30 Hz
GB         0
PC         4.00

LO NMR P131 parameters
CY         35.00 cm
CX         21.50 cm
F1         11.600 ppm
F2         4177.51 Hz
F3         -0.400 ppm
FE         -144.05 Hz
WDTH       12.990 ppm/cm
AQCN       123.47314 Hz/cm
  
```

0.996  
0.997  
0.918  
0.923  
0.928  
1.0375  
1.059  
1.074  
1.074  
1.095  
1.095  
1.1247  
1.168  
1.188  
1.351  
1.388  
1.593  
1.593  
1.544  
1.598  
1.608  
1.608  
1.618  
1.623  
1.623  
1.675  
1.675  
1.69  
1.69  
1.848  
1.993  
1.993  
2.145  
2.204  
2.289  
2.289  
2.347  
2.500  
2.500  
2.706  
2.706  
2.715  
2.715  
2.1903  
2.213  
3.186  
3.186  
3.614  
3.614  
3.726  
3.726  
3.790  
3.790  
3.825  
3.825  
4.018  
4.018  
4.492  
4.492  
4.252  
4.252  
4.268  
4.268  
4.272  
4.272  
4.283  
4.283  
4.287  
4.287  
4.292  
4.292  
4.3015  
4.3015  
4.3126  
4.3126  
4.544  
4.544

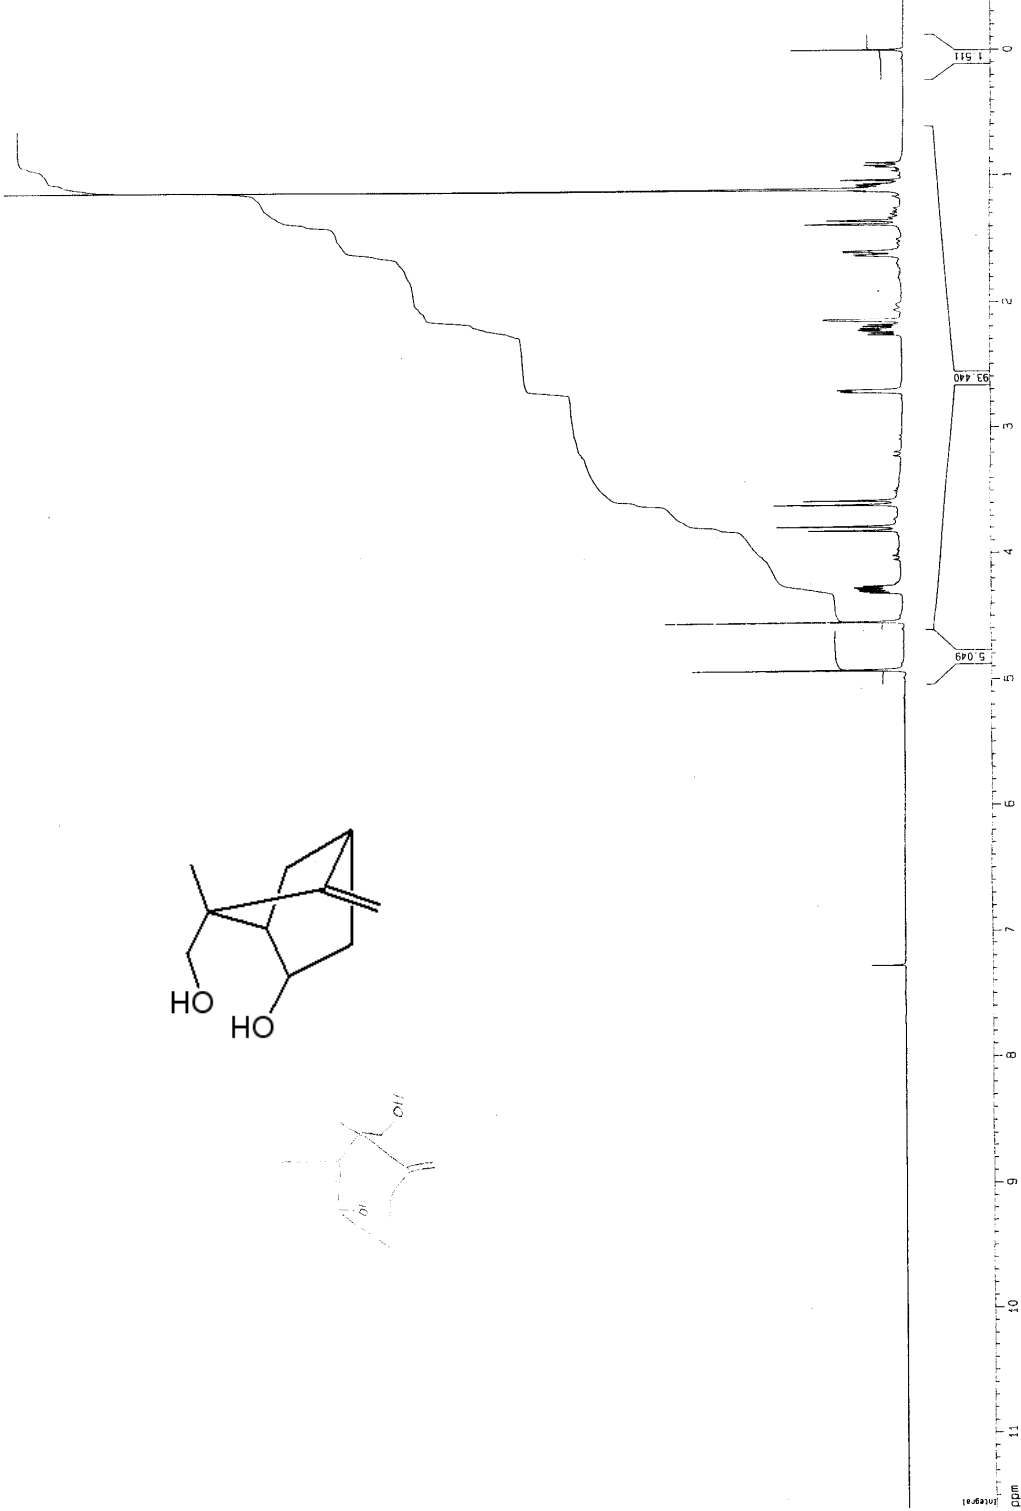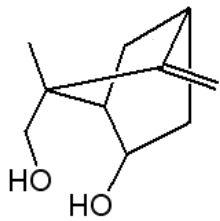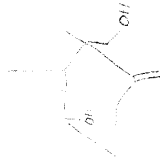

NV3/6.C8-D1  
 c13cpdno.k CDC13 (C:\bruker\xwin-nmr) nv 58

Current Data Parameters  
 NAME In-Spec26-2003  
 EXPNO 4  
 PROCNO 1  
 F2 - Acquisition Parameters  
 Date\_ 20030925  
 Time 21:56  
 INSTRUM AVSBO  
 PULPROG 5 mm QNP JH/1  
 D 2  
 O 65536  
 SOLVENT CDCl3  
 NS 648  
 DS 4  
 SWH 27173.912 Hz  
 FIDRES 0.414641 Hz  
 AQ 1.205924 sec  
 RG 14956.5  
 SK 400 usbc  
 TE 300.0 K  
 D1 0.01000000 sec  
 d11 0.03000000 sec  
 d12 0.00020000 sec  
 ===== CHANNEL f1 =====  
 NUC1 13C  
 P1 8.50 usbc  
 PL1 6.00 dB  
 SFO1 90.5646660 MHz  
 ===== CHANNEL f2 =====  
 CPDPRG2 waltz16  
 NUC2 1H  
 P2 8.00 usbc  
 PL2 1.00 dB  
 PL12 17.77 dB  
 PL13 120.00 dB  
 SFO2 360.1314465 MHz  
 F2 - Processing parameters  
 SI 32768  
 SF 90.5647689 MHz  
 KW 64  
 EN 64  
 SSB 0  
 LB 1.00 Hz  
 GB 0  
 PC 1.40  
 1D NMR plot parameters  
 CY 35.00 cm  
 CX 8.70 cm  
 F1 215.000 ppm  
 F1 19.66927 Hz  
 F2 -5.000 ppm  
 F2 -462.77 Hz  
 PRGM 628071 ppm/cm  
 ACQ 589.20128 Hz/cm

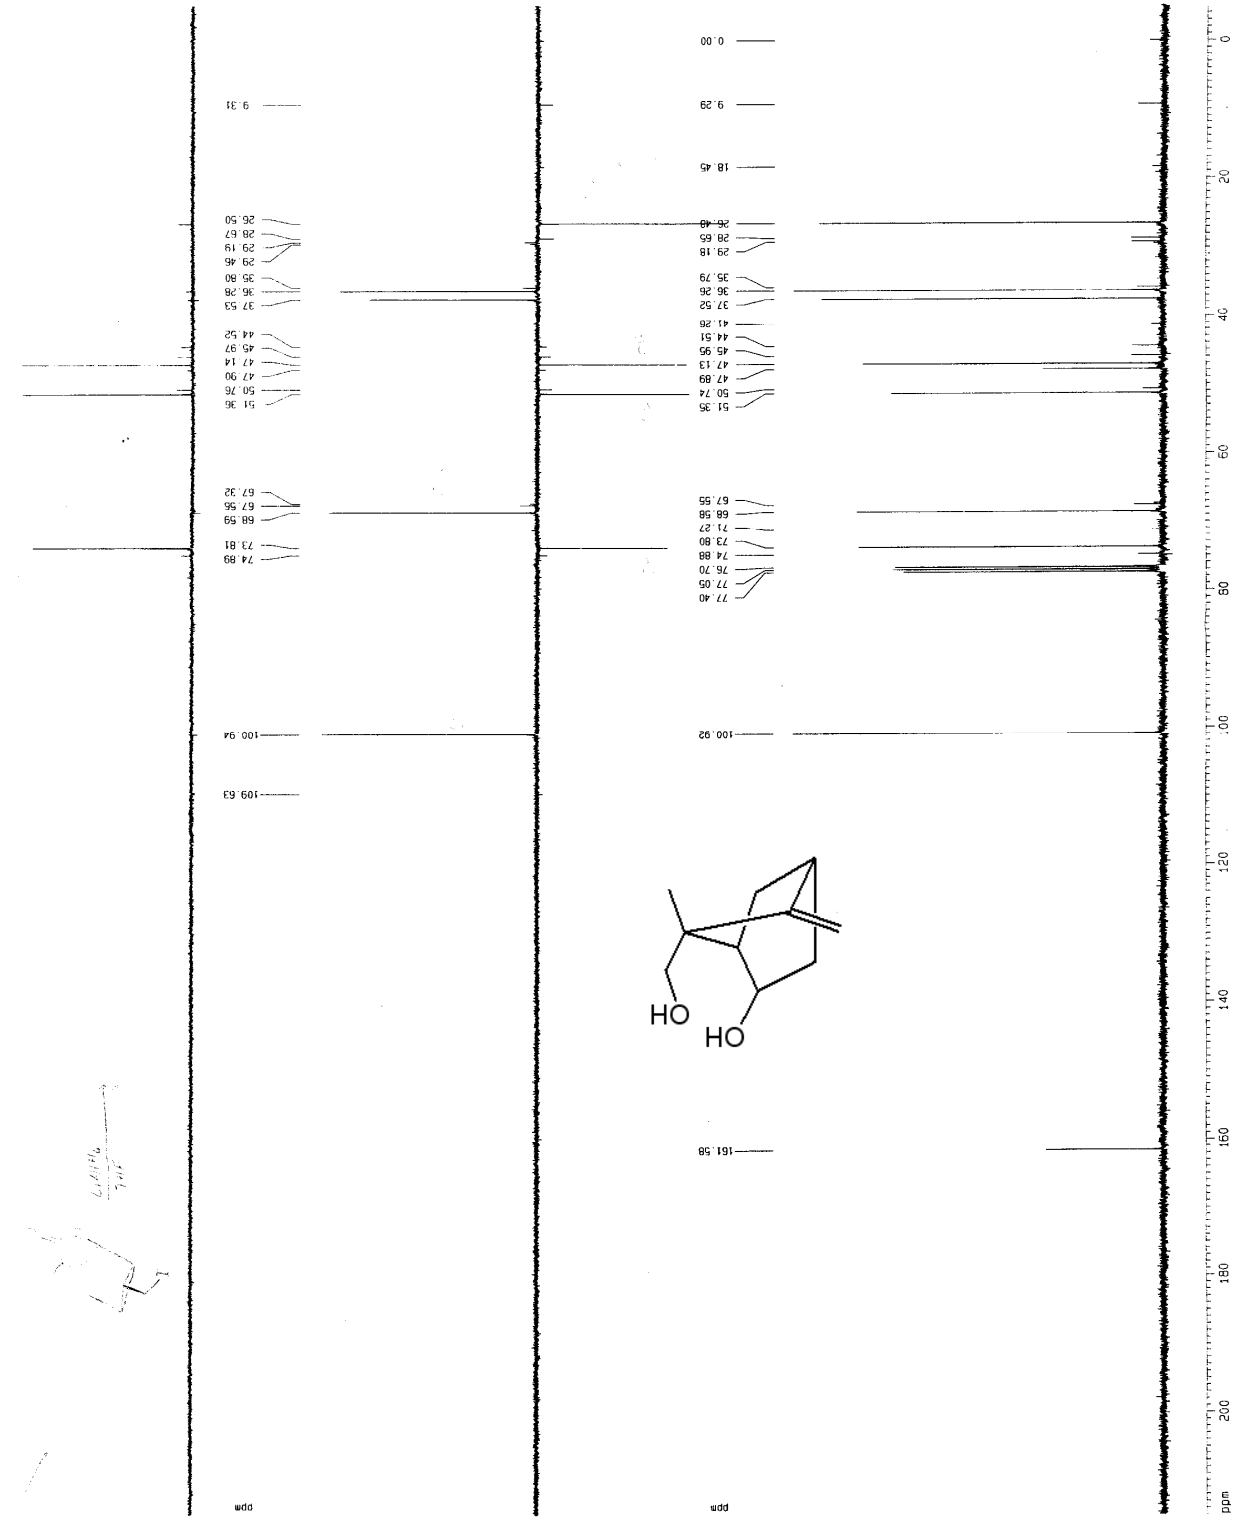

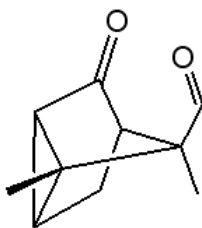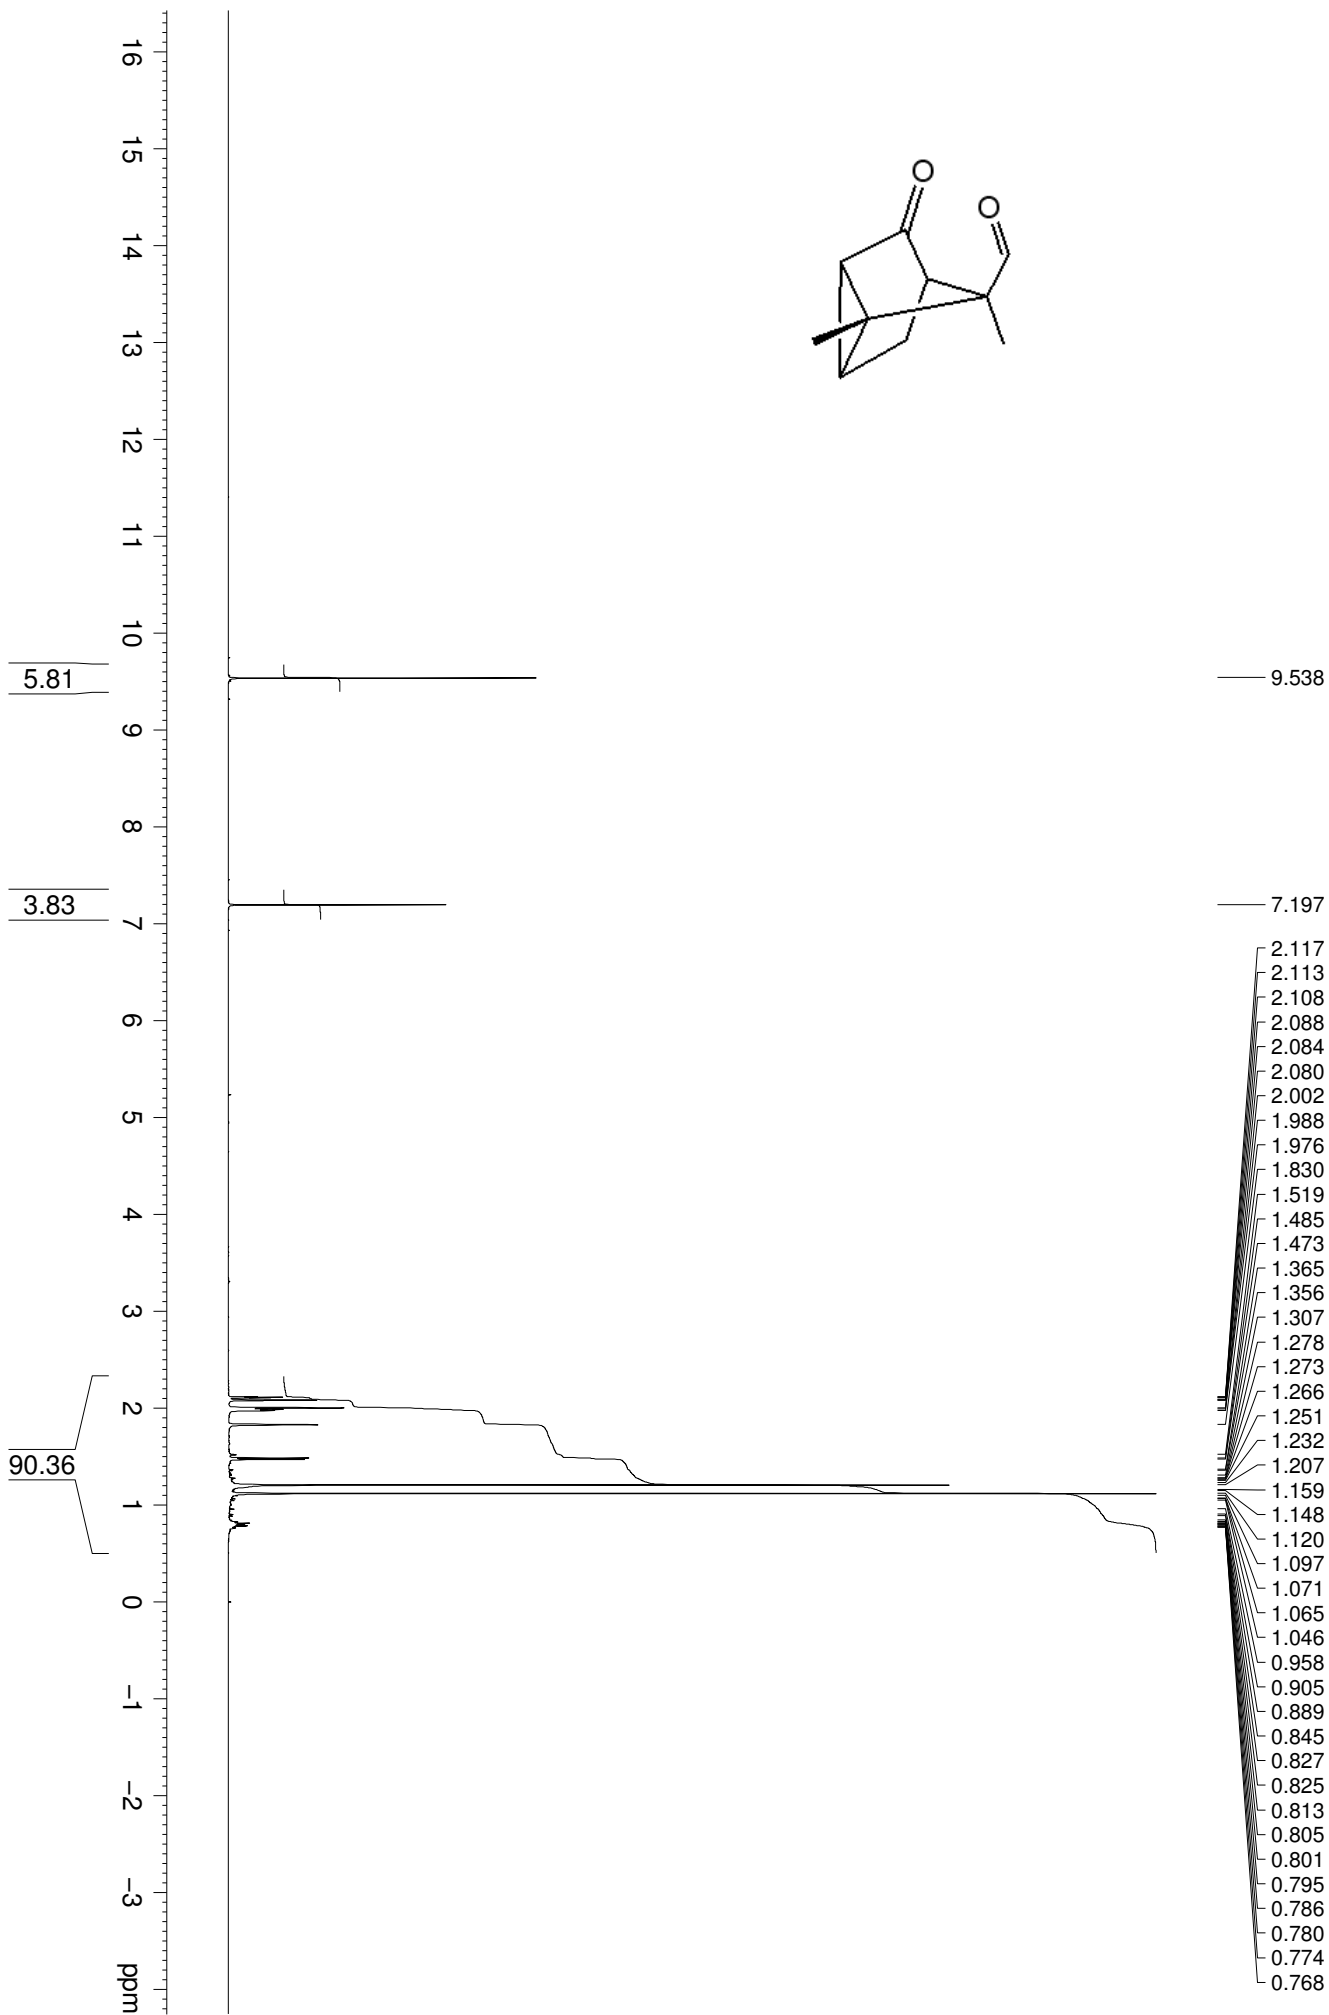

VV2-8-2

210.16  
204.23

77.36  
77.24  
77.04  
76.72

58.39

48.13

35.01  
30.40  
27.56  
25.87

11.40  
11.29

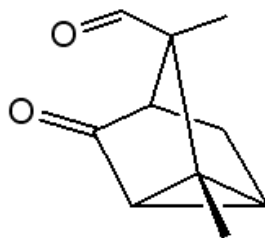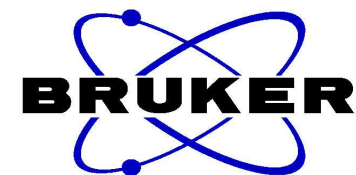

Current Data Parameters  
 NAME VV130402  
 EXPNO 30  
 PROCNO 1

F2 - Acquisition Parameters  
 Date\_ 20130402  
 Time 19.22  
 INSTRUM DPX400  
 PROBHD 5 mm QNP 1H/13  
 PULPROG zgpg30  
 TD 65536  
 SOLVENT CDCl3  
 NS 1024  
 DS 4  
 SWH 23980.814 Hz  
 FIDRES 0.365918 Hz  
 AQ 1.3664756 sec  
 RG 812.7  
 DW 20.850 usec  
 DE 6.00 usec  
 TE 293.2 K  
 D1 2.0000000 sec  
 d11 0.0300000 sec  
 DELTA 1.89999998 sec  
 TD0 1

==== CHANNEL f1 =====  
 NUC1 13C  
 P1 8.50 usec  
 PL1 -2.60 dB  
 SFO1 100.6228298 MHz

==== CHANNEL f2 =====  
 CPDPRG2 waltz16  
 NUC2 1H  
 PCPD2 80.00 usec  
 PL2 -1.50 dB  
 PL12 17.50 dB  
 PL13 17.50 dB  
 SFO2 400.1316005 MHz

F2 - Processing parameters  
 SI 32768  
 SF 100.6127690 MHz  
 WDW EM  
 SSB 0  
 LB 1.00 Hz  
 GB 0  
 PC 1.40

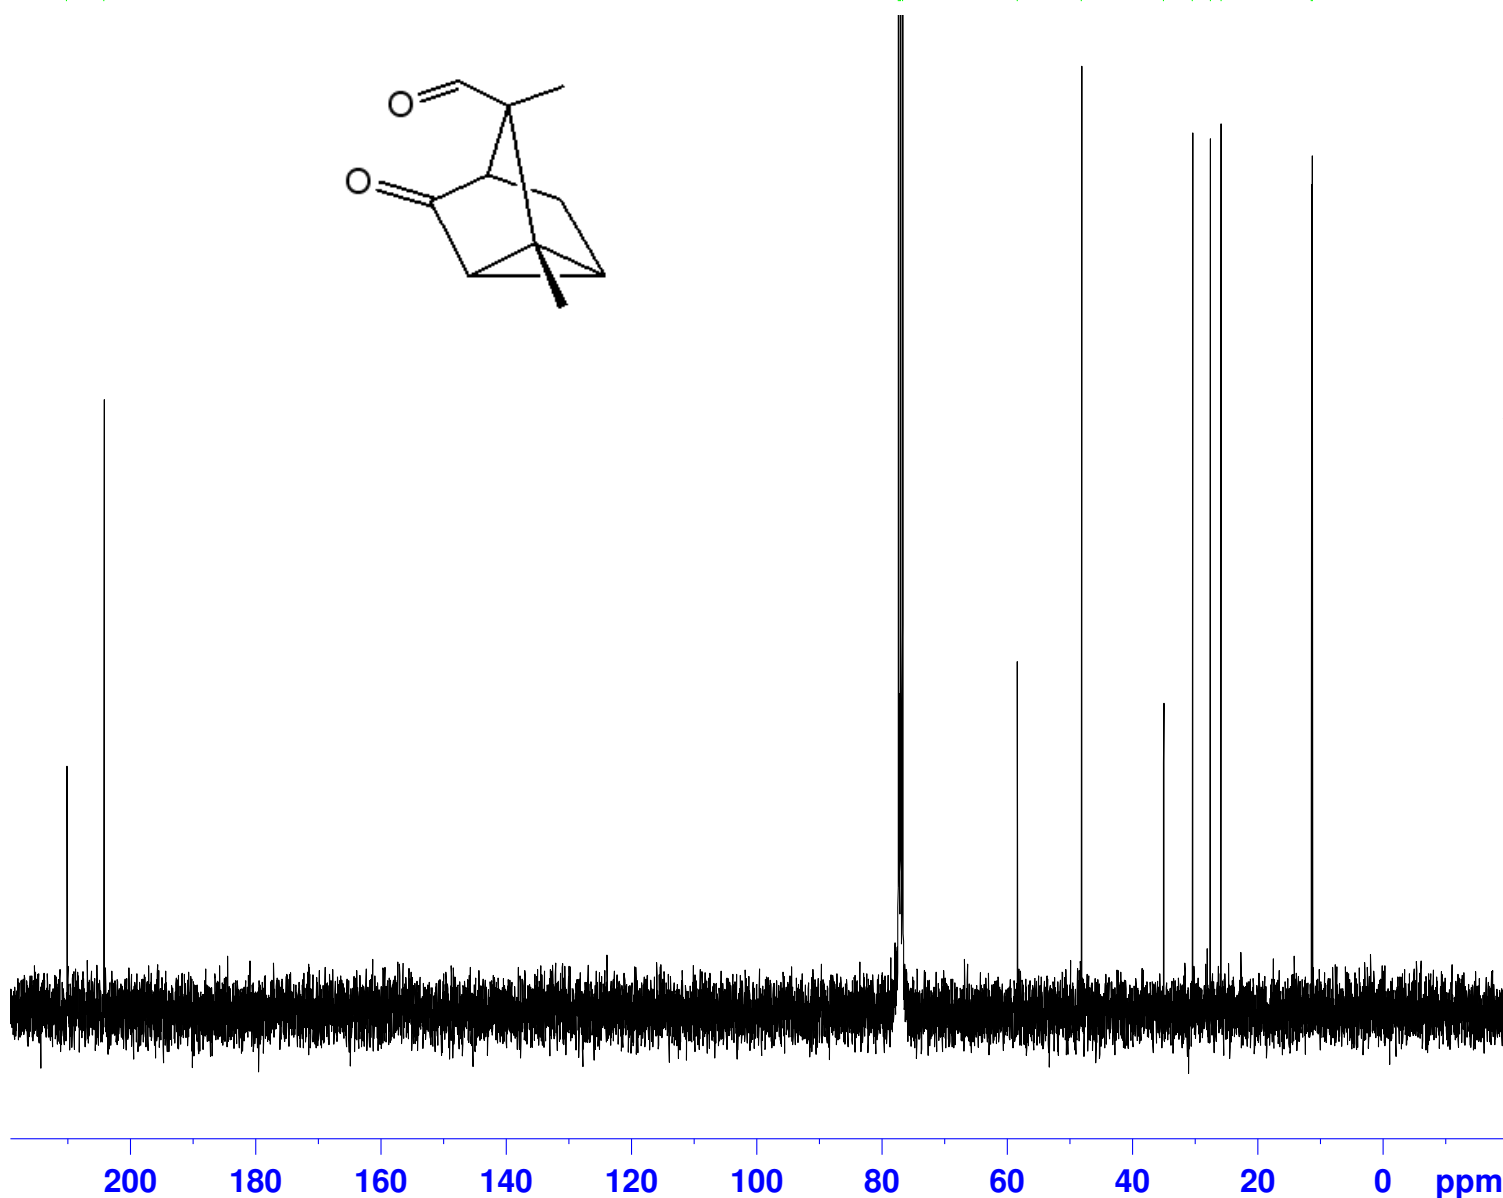

NV3/74  
 proton.k CDC13 {C:\bruker\Xwin-nmr} nv 12

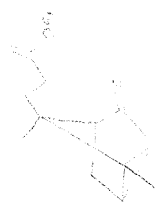

Current: 2583 Parameters  
 NAME 0-MS-11-2024  
 EXPNO 1  
 PROCNO 1  
 F2 - Acquisition Parameters  
 Date\_ 20080818  
 Time 11:32  
 INSTRUM spect  
 PULPROG zgpg30  
 GAMMA 5 ms GPC 1H:1  
 PULPROG 32786  
 TD 65536  
 SOLVENT CDC13  
 NS 128  
 DS 4  
 SWH 7440.275 Hz  
 FIDRES 0.227065 Hz  
 AQ 2.202095 sec  
 RG 228.1  
 CW 67.200 usec  
 PC 15.00 usec  
 RE 3.00 usec  
 DE 1.00 usec  
 DT 0.1000000 sec  
 ===== CHANNEL f1 =====  
 NUC1 1H  
 P1 11.60 usec  
 PL1 1.00 dB  
 SFO1 360.132240 MHz  
 F2 - Processing parameters  
 SI 16384  
 SF 360.1300006 MHz  
 MDW 64  
 SSB 0  
 GB 0  
 PC 4.00  
 ID NMR 010t parameters  
 CX 35.00 cm  
 CY 21.50 cm  
 CZ 11.800 cm  
 F1 410.00 Hz  
 F2 -144.05 Hz  
 PRGCM 0.34286 ppm/cm  
 -DCM 123.47314 Hz/cm

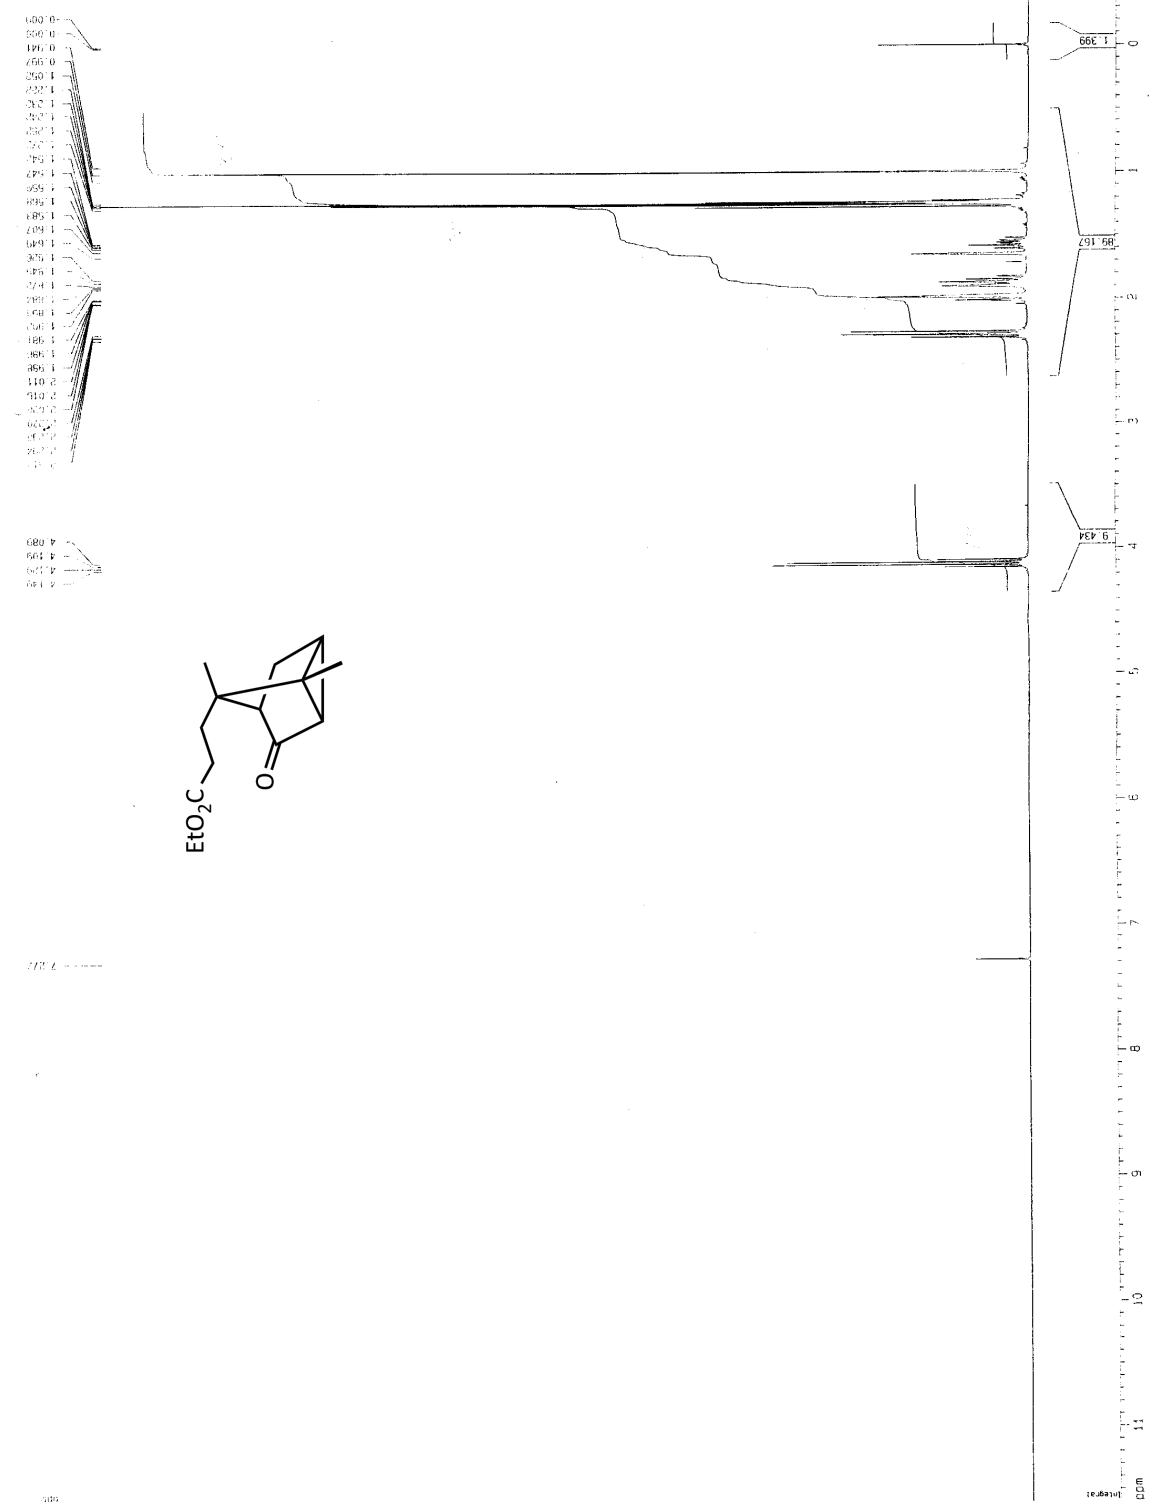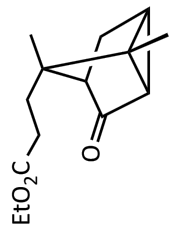

7.217

588

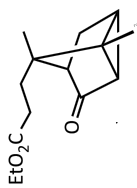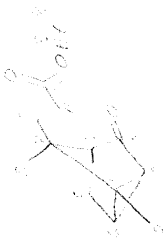

NV3/74  
 c13cpdno.k CDC13 (C:\bruker\Xwin-nmr) nv 53

```

===== CHANNEL F1 =====
NUC1 13C
P1 1.00000000
SFO1 90.5626000 MHz

===== CHANNEL F2 =====
CPDPRG2 waltz16
NUC2 1H
P2 0.00000000
SFO2 400.1460000 MHz

===== Processing parameters =====
SI 32768
SF 90.5627000 MHz
AQ 0.00000000
RG 327.68
WDW EM
SSB 0
GB 0
PC 1.00000000
DC 0
SC 1.40

===== 1D NMR plot parameters =====
CA 35.00 cm
C1 0.00000000
F1 218.0000000 cm
F2 15.6327000 Hz
F3 45.0000000 cm
F4 -42.7700000 Hz
PC2 6.28271000/cm
-SCN 5898920111 Hz/cm
  
```

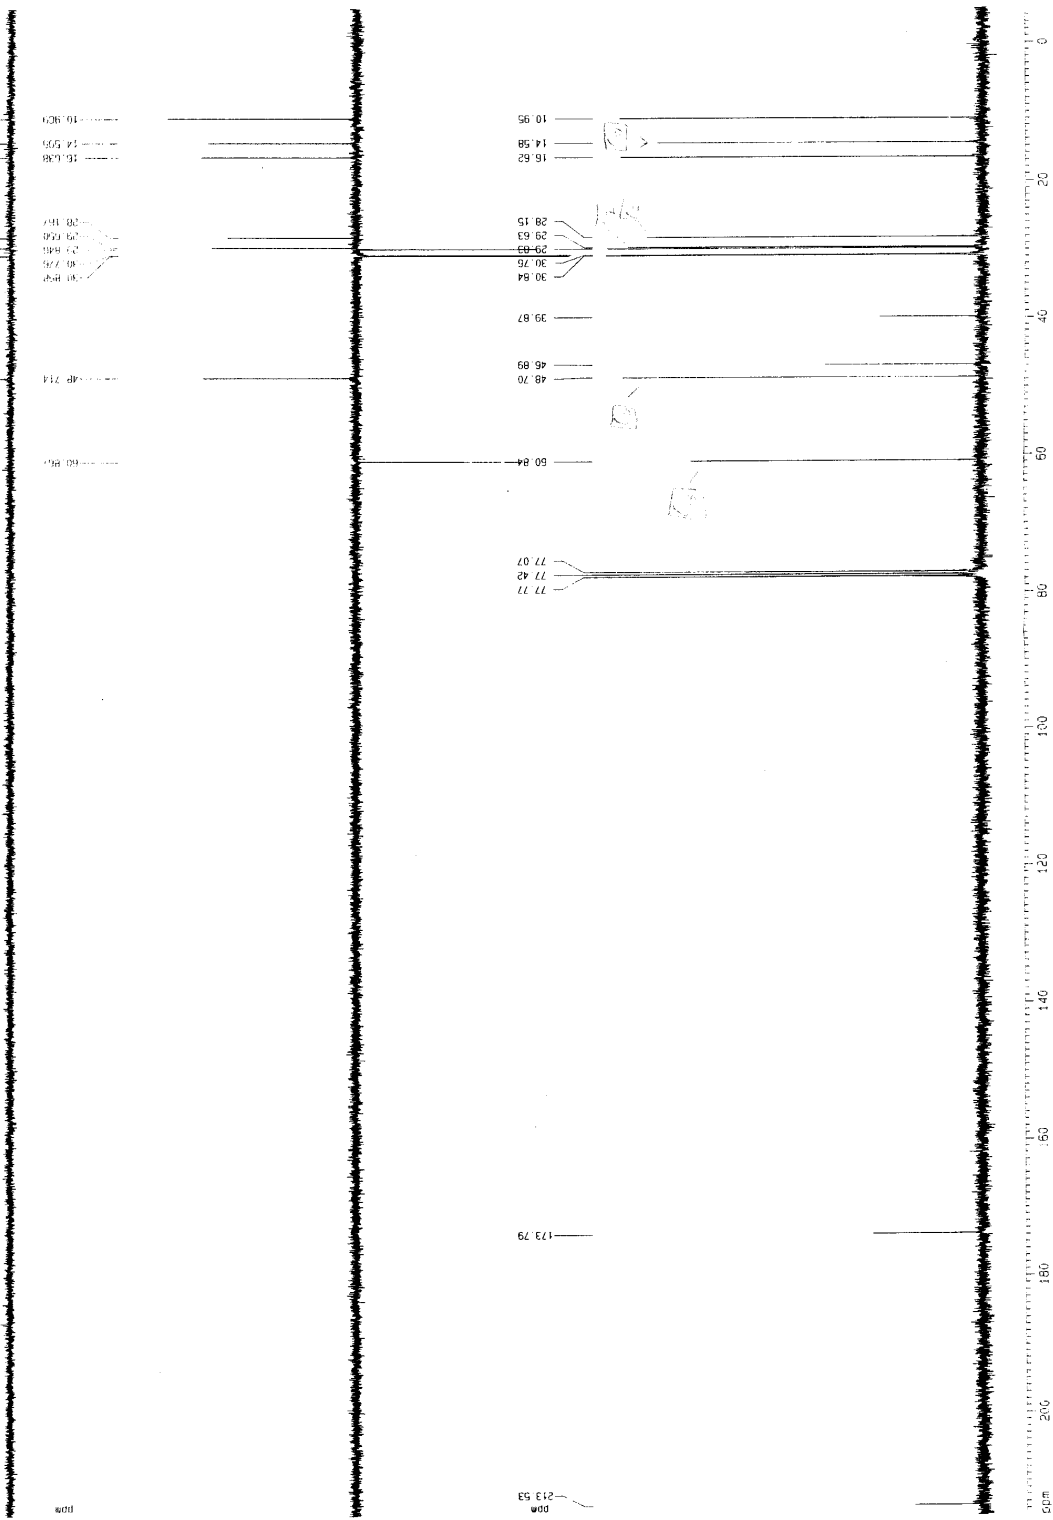

AAB/40/A  
 PROTON CDC13 (C:\u) General 5

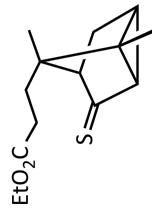

Current Data Parameters  
 NAME Jan28-2005-4.5  
 EXPNO 1  
 PROCNO 1

F2 - Acquisition Parameters  
 Date\_ 20050129  
 Time 14.48  
 INSTRUM spect  
 PROBHD 5 mm QNP 1H/1  
 PULPROG zg30  
 TO 65536  
 SOLVENT CDC13  
 NS 16  
 DS 2  
 SWH 8278.146 Hz  
 FIDRES 0.126314 Hz  
 AQ 3.9584243 sec  
 RG 101.6  
 DW 60.400 usec  
 DE 5.00 usec  
 TE 300.0 K  
 D1 1.00000000 sec

===== CHANNEL f1 =====  
 NUC1 1H  
 P1 10.00 usec  
 PL1 0.00 dB  
 SF01 400.1324710 MHz

F2 - Processing parameters  
 SI 32768  
 SF 400.1300110 MHz  
 WDW EM  
 SSB 0  
 LB 0.30 Hz  
 GB 0  
 PC 6.00

1D NMR plot parameters  
 CX 20.00 cm  
 CY 12.50 cm  
 F1P 11.000 ppm  
 F1 4401.43 Hz  
 F2P -1.000 ppm  
 F2 -400.13 Hz  
 PPMCM 0.60000 ppm/cm  
 HZCM 240.07800 Hz/cm

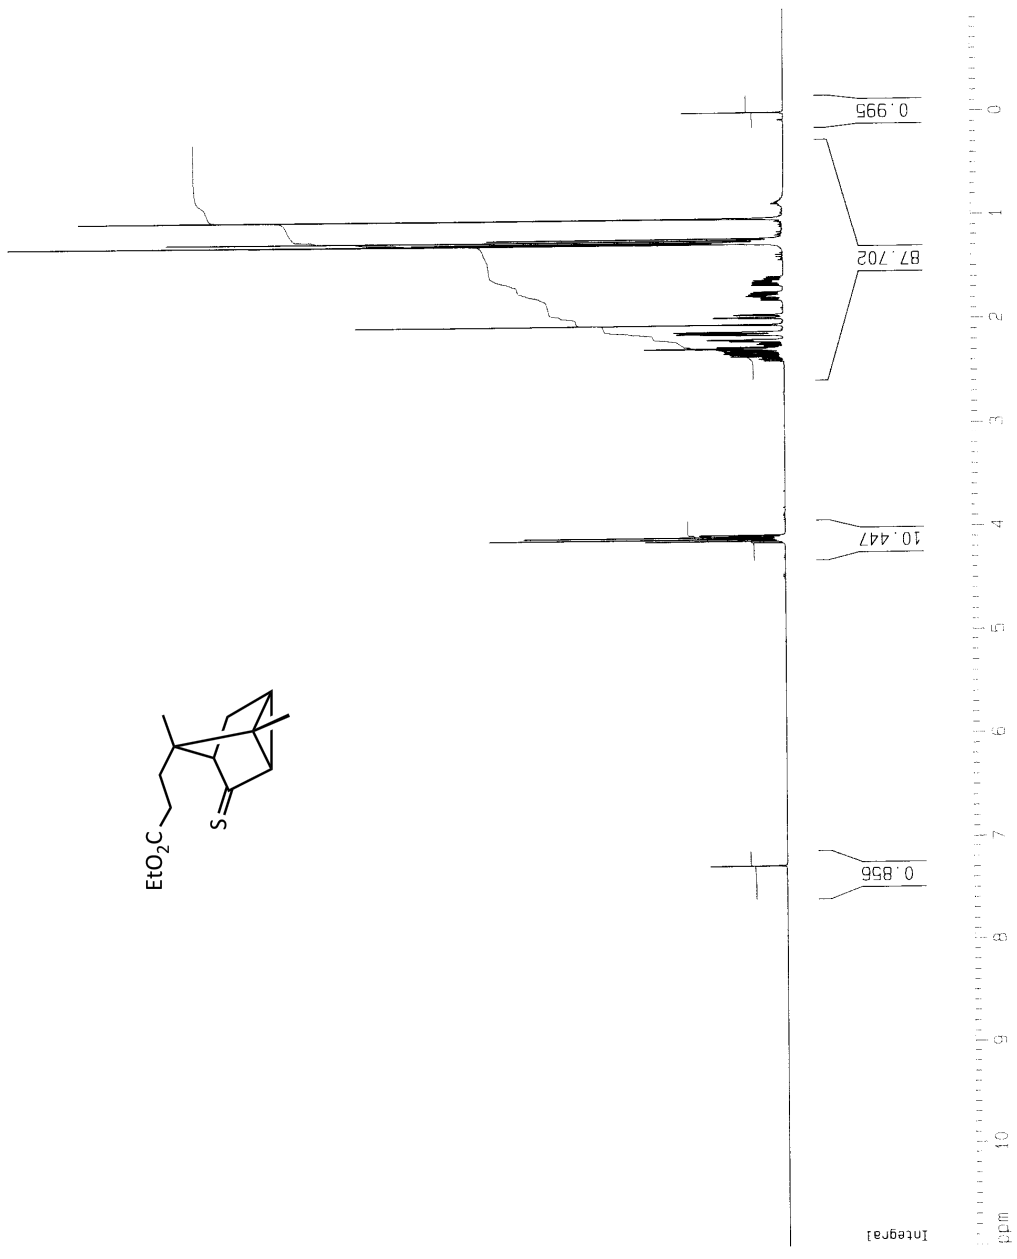

AAB/40/A  
C13CPDONLY\_kc1 CDC13 (C:\u\ General 5

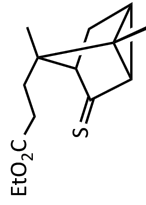

Current Data Parameters  
NAME Jan28-2005-4.5  
EXPNO 2  
PROCNO 1

F2 - Acquisition Parameters  
Date\_ 20050129  
Time 15.00  
INSTRUM spect  
PROBHD 5 mm QNP 1H/1  
PULPROG zgpg30  
TD 65536  
SOLVENT CDCl3  
NS 640  
DS 4  
SWH 31250.000 Hz  
FIDRES 0.476837 Hz  
AQ 1.0488259 sec  
RG 1625.5  
DM 16.000 usec  
DE 6.00 usec  
TE 300.0 K  
D1 0.01000000 sec  
d11 0.03000000 sec  
d12 0.00002000 sec

===== CHANNEL f1 =====  
NUC1 13C  
P1 9.00 usec  
PL1 6.00 dB  
SF01 100.626148 MHz

===== CHANNEL f2 =====  
CPDPRG2 waltz16  
NUC2 1H  
PCPD2 80.00 usec  
PL2 0.00 dB  
PL12 17.85 dB  
PL13 19.00 dB  
SF02 400.1316005 MHz

F2 - Processing parameters  
SI 32768  
SF 100.6127723 MHz  
WDW EM  
SSB 0  
LB 1.00 Hz  
GB 0  
PC 1.40

1D NMR plot parameters  
CX 20.00 cm  
CY 12.50 cm  
F1P 280.000 ppm  
F1 28171.58 Hz  
F2P 0.000 ppm  
F2 0.00 Hz  
PRMCM 14.00000 ppm/cm  
HZCM 1408.57874 Hz/cm

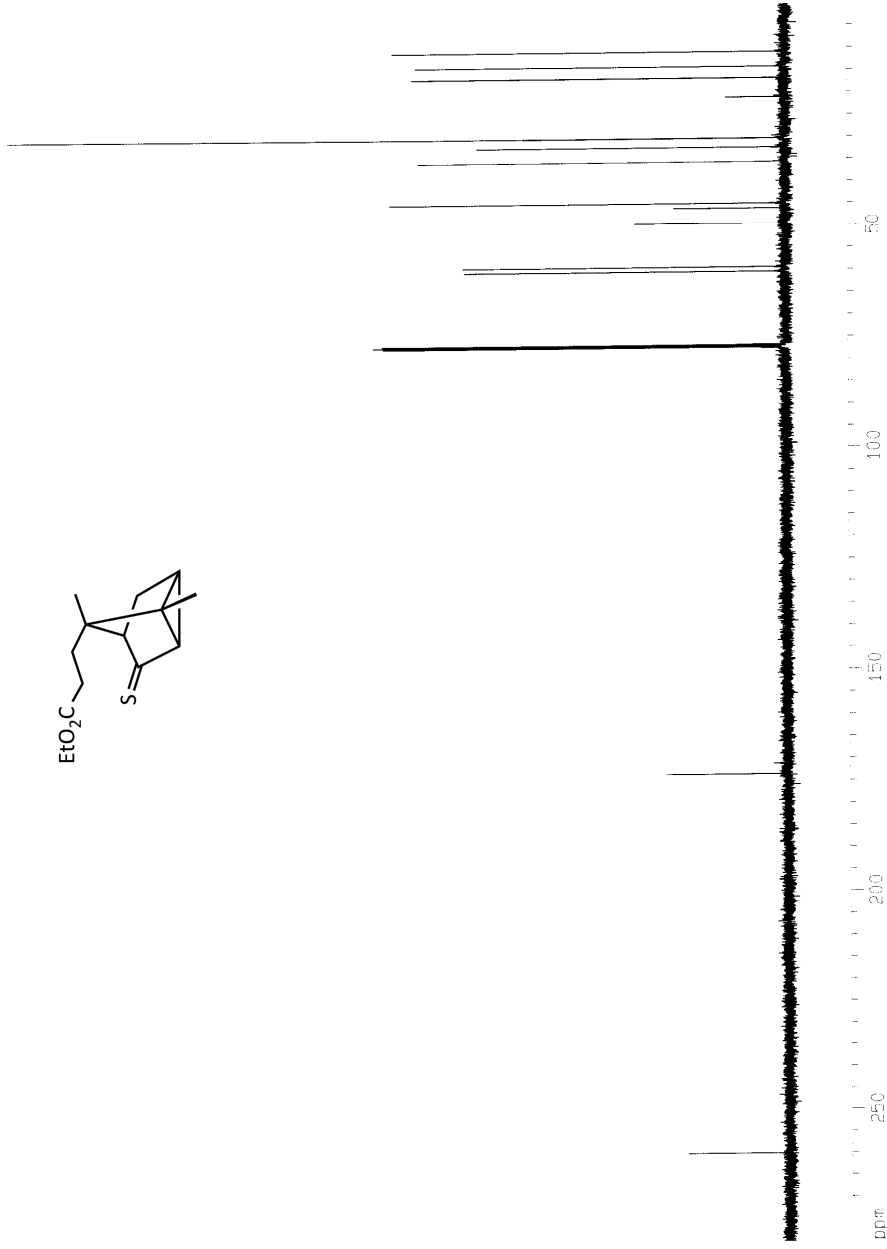



AAB/44/A  
PROTON CDC13 (C:\u) General 2

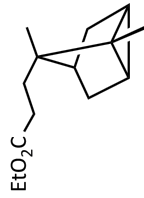

Current Data Parameters  
NAME Feb08-2005-4.2  
EXPNO 1  
PROCNO 1

F2 - Acquisition Parameters  
Date\_ 20050208  
Time 16.03  
INSTRUM spect  
PROBHD 5 mm GNP 1H/1  
PULPROG zg30  
TD 65536  
SOLVENT CDCl3  
NS 16  
DS 2  
SWH 8278.146 Hz  
FIDRES 0.126314 Hz  
AQ 3.9584243 sec  
RG 50.8  
DW 60.400 usec  
DE 6.00 usec  
TE 300.0 K  
D1 1.60000000 sec

===== CHANNEL f1 =====  
NUC1 1H  
P1 10.00 usec  
PL1 0.00 dB  
SF01 400.1324710 MHz

F2 - Processing parameters  
SI 32768  
SF 400.1300103 MHz  
WDW EM  
SSB 0  
LB 0.30 Hz  
GB 0  
PC 6.00

ID NMR plot parameters  
CX 20.00 cm  
CY 12.50 cm  
F1P 11.000 ppm  
F1 4401.43 Hz  
F2P -1.000 ppm  
F2 -400.13 Hz  
PPMCM 0.60000 ppm/cm  
HZCM 240.07800 Hz/cm

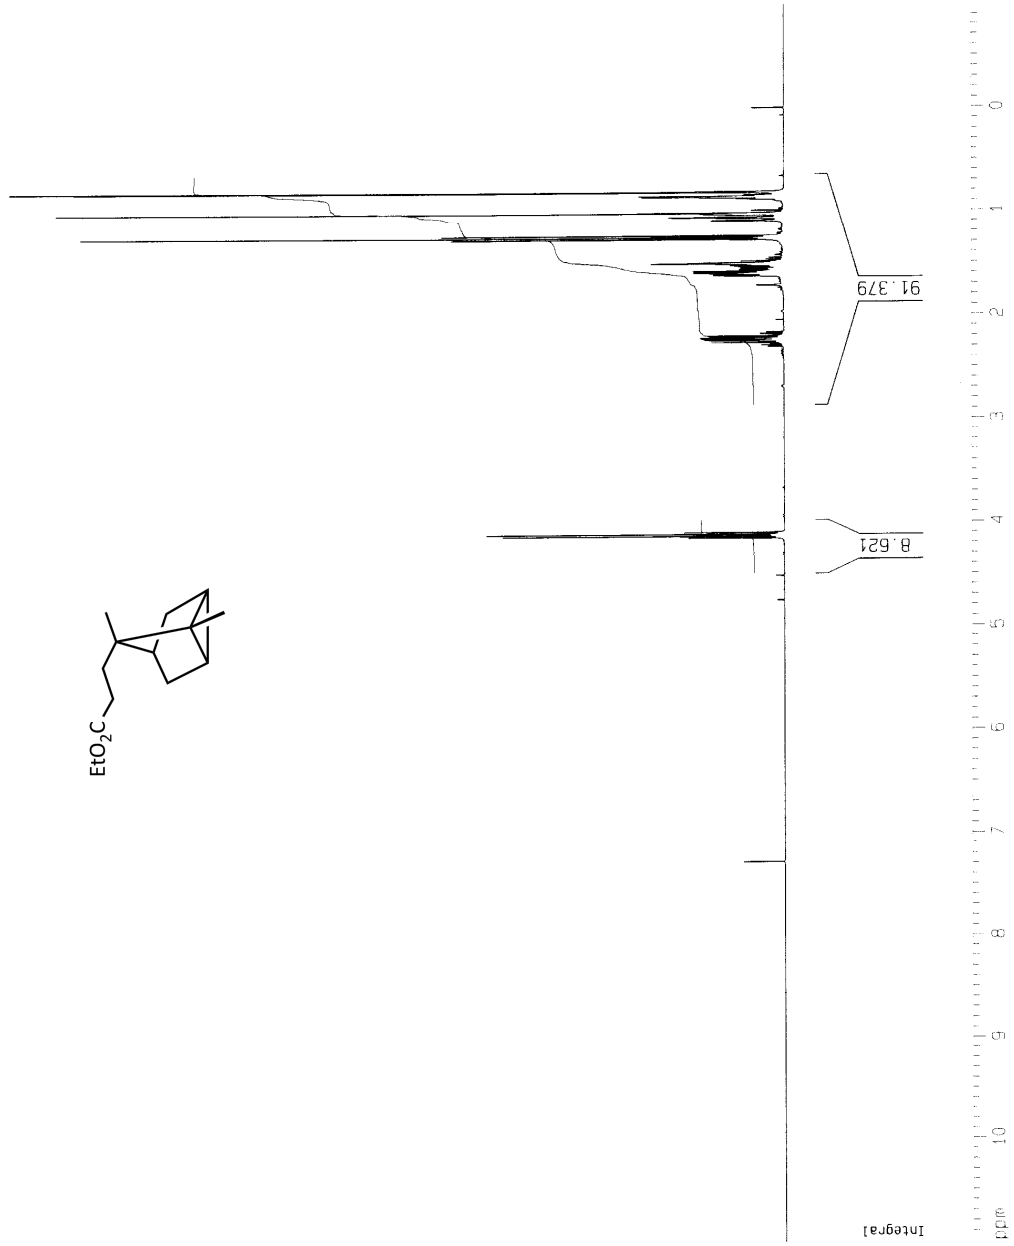

AAB/44/A  
 C13CPDONLY\_kc1 CDC13 [C:\u\ General 2

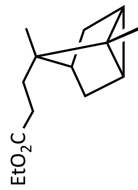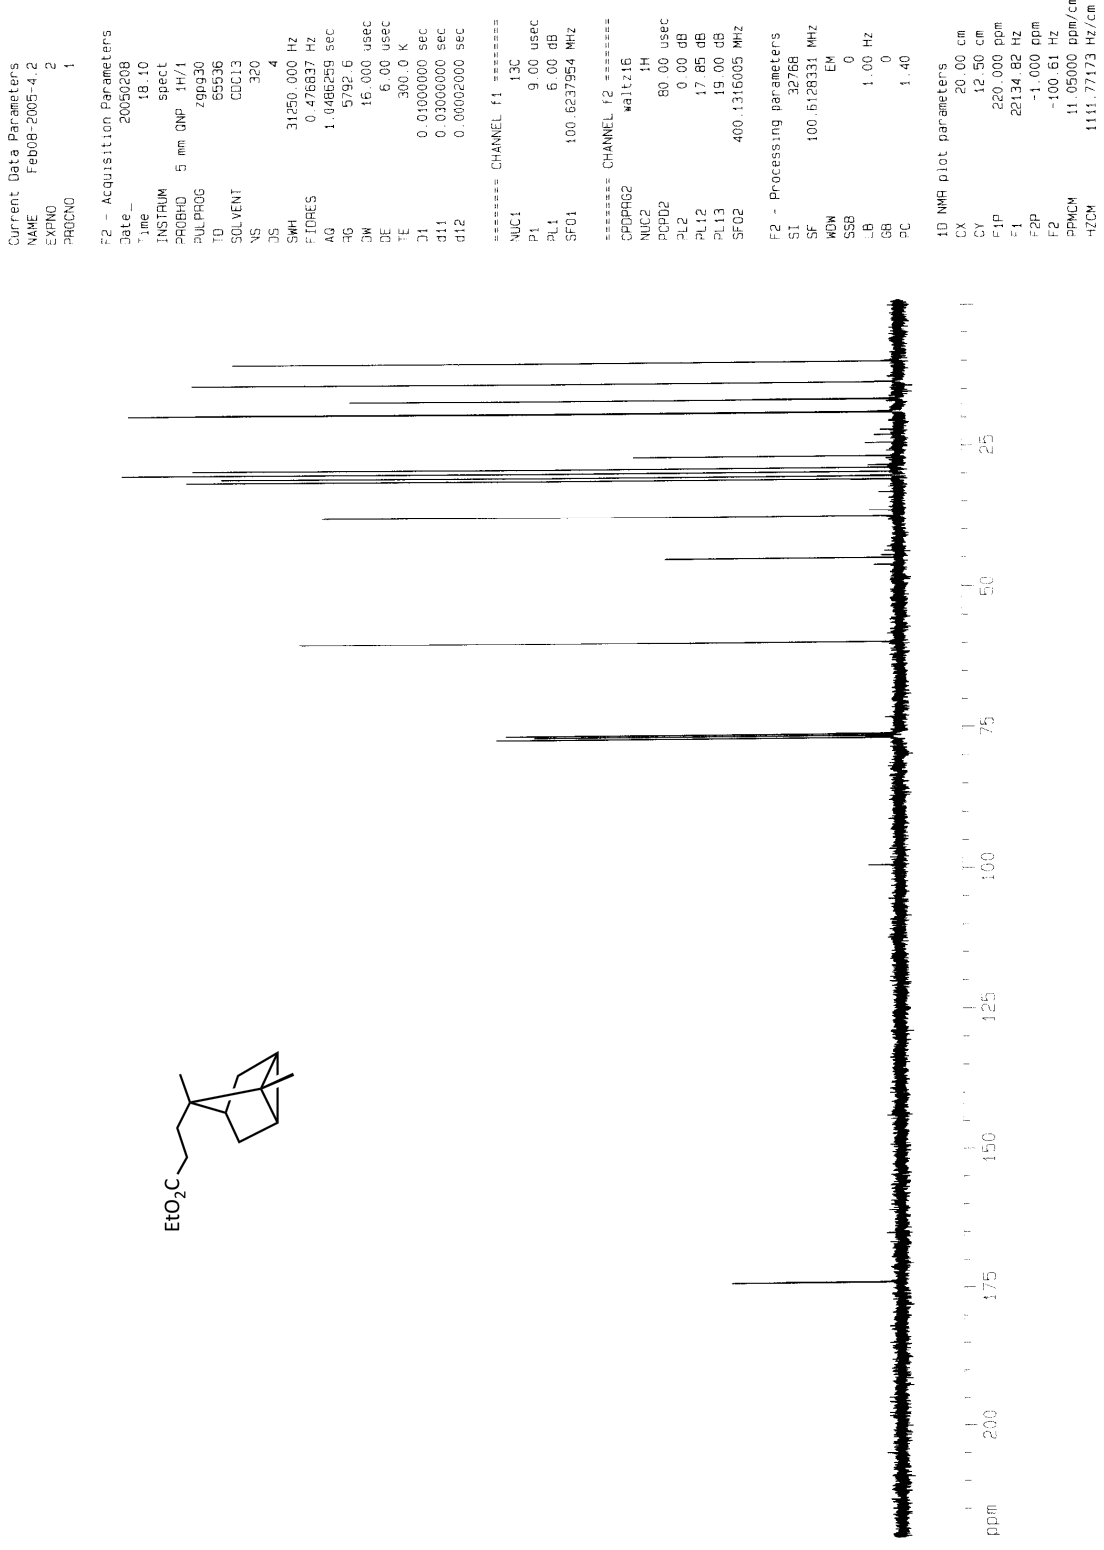

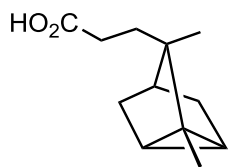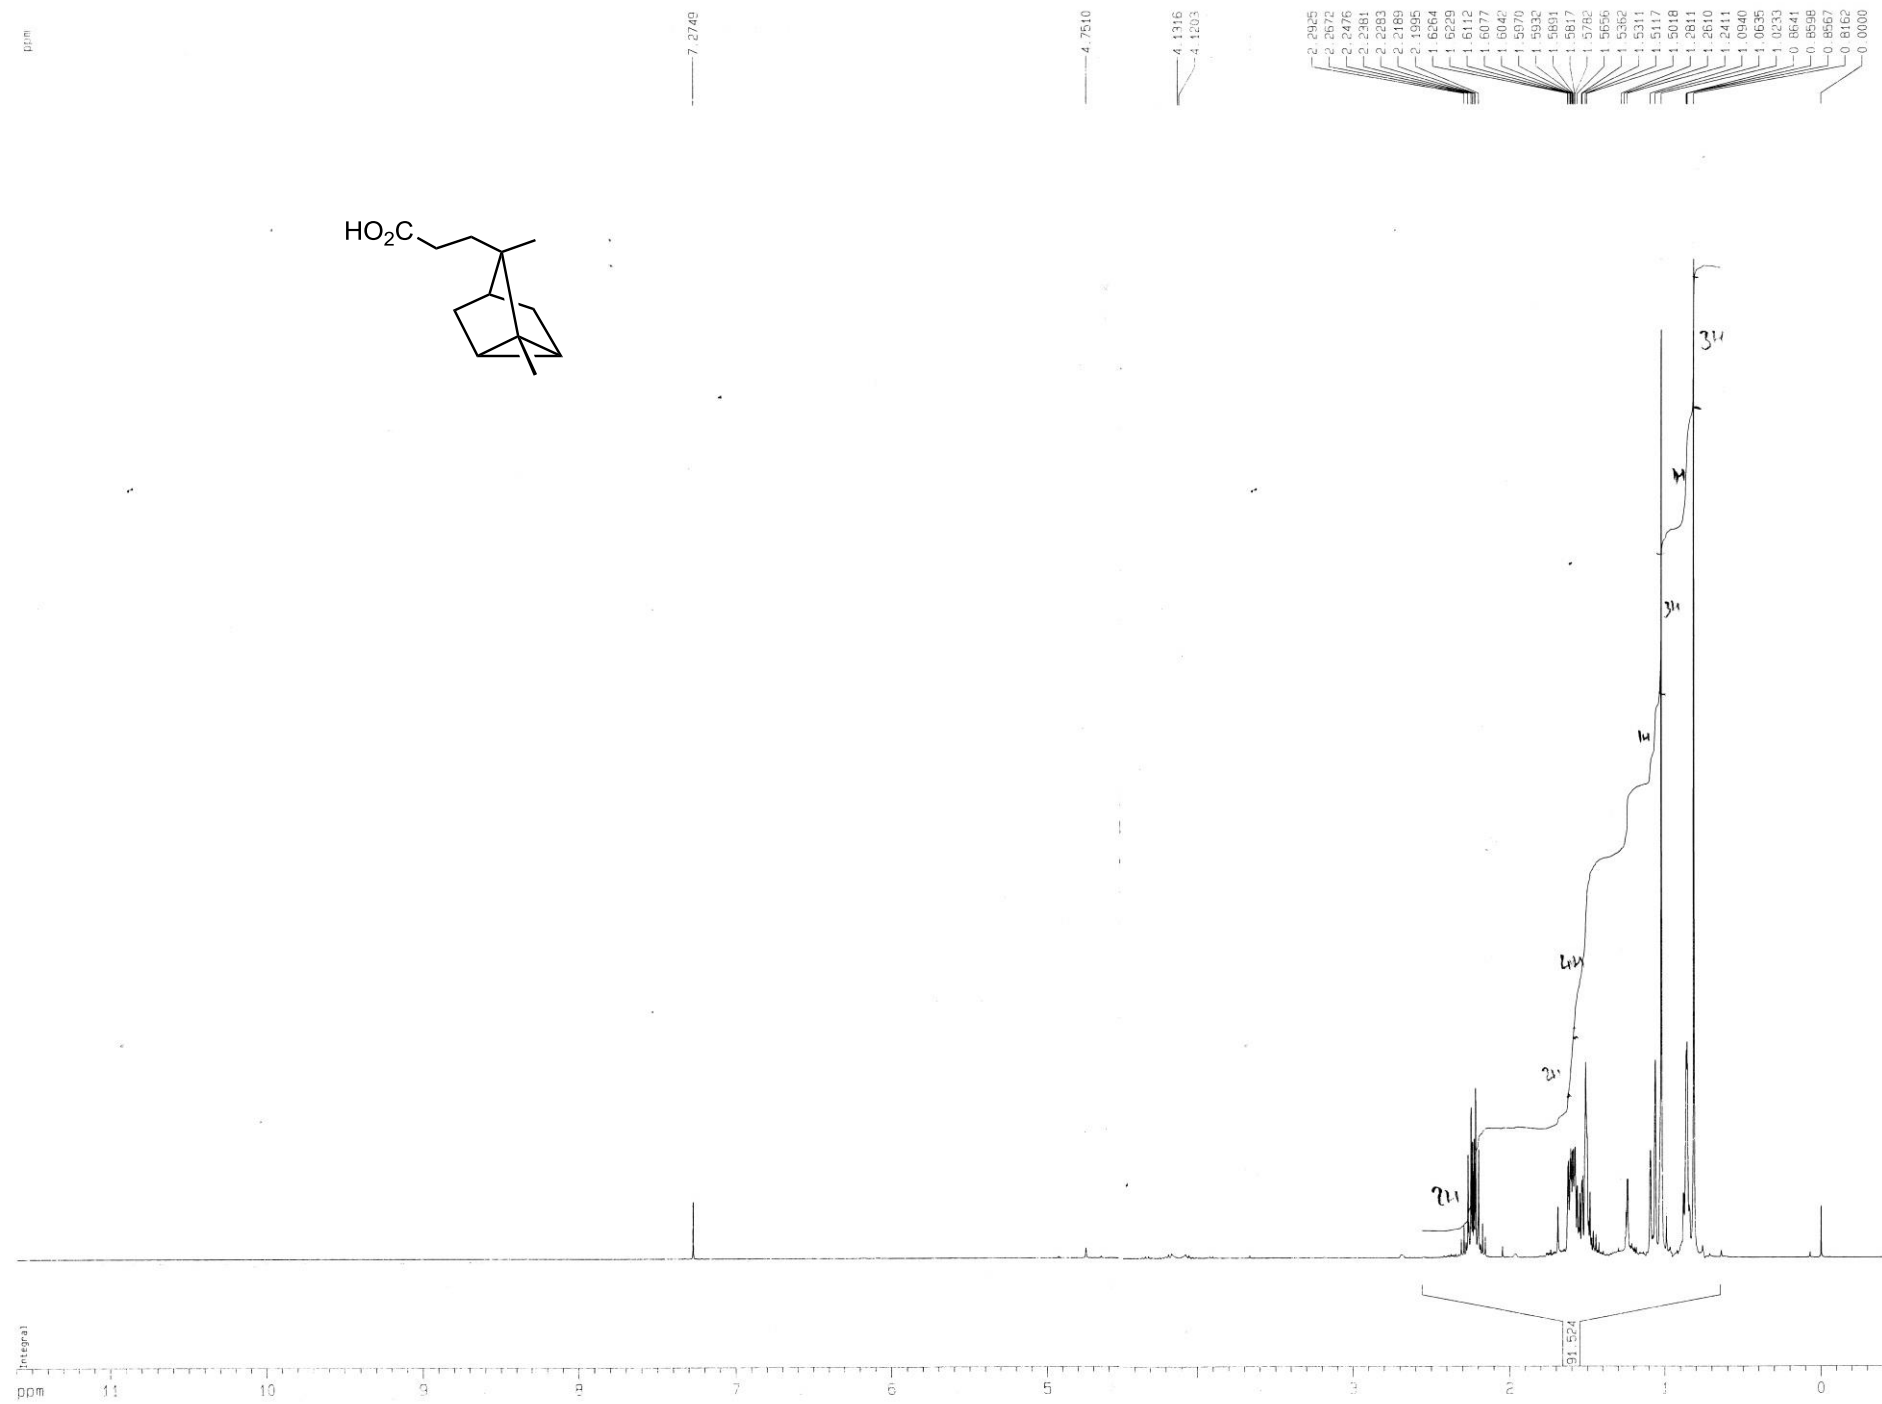

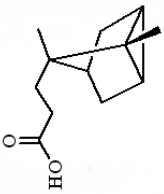

```

Current Data Parameters
NAME      1C-13C-2002
EXPNO     1
PROCNO    1
PROCNAME  1
F2 - Acquisition Parameters
Date_    20020223
Time     8:38
INSTRUM  zgpg30
PROBHD   5 mm QNP 1H/1
PULPROG  zgpg30
AQ       0.25683
RG        640
AQ2       0.00000
RG2        640
SI        4
SF        271.133 MHz
NUC1      13C
NUC2      13C
P1        8.50 usec
PC        0.00 usec
PL1       0.00 dB
PL2       0.00 dB
SFO1      90.5047500 MHz
===== CHANNEL f1 =====
NUC1      13C
NUC2      13C
P1        8.50 usec
PC        0.00 usec
PL1       0.00 dB
PL2       0.00 dB
SFO1      90.5047500 MHz
===== CHANNEL f2 =====
CPDPRG2   waltz16
NAME      1H
NUC1      1H
PC        80.00 usec
PL1       1.00 dB
PL2       1.00 dB
PL3       1.00 dB
SFO1      400.1462000 MHz
===== Processing parameters =====
SI        4
SF        360.1314450 MHz
SFO2      337.768
RG        640
PC        90.5047500 MHz
RG2       0
AQ2       0.00000
SI        1
SFO1      1.00 MHz
PC        1.40
===== ICP1 parameters =====
CY       35.00 cm
CX       8.70 cm
F1P      215.000 dBm
F1       19.46927 MHz
F2P      -5.500 dBm
F2       -95.77 Hz
===== RDC parameters =====
RDC1    5.28871 dBm/cm
RDC2    5.692111 Hz/cm
    
```

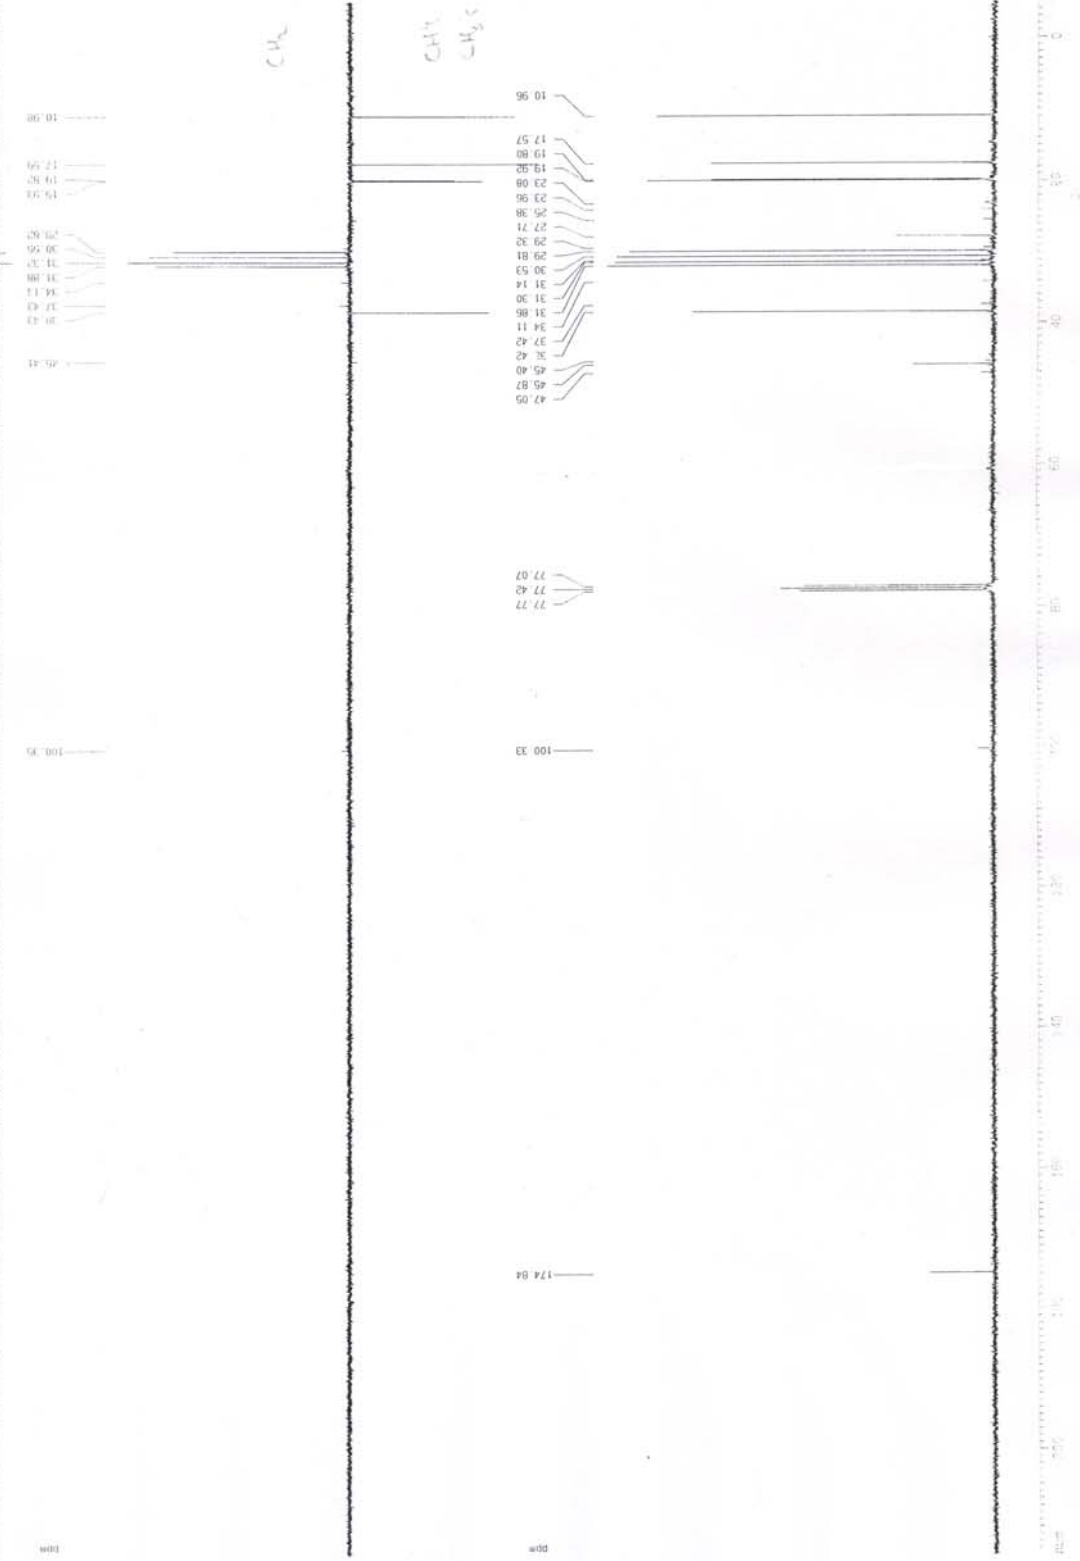

Supplement: c9ob00630c1.pdf [file c9ob00630c1.pdf]
